1 **Mutagenesis of the Ammonium Transporter *AcAmt* Reveals a Reproductive Role**  
2 **and a Novel Ammonia-Sensing Mechanism in the Malaria Vector Mosquito**  
3 ***Anopheles coluzzii***

4  
5 Zi Ye<sup>a1</sup>, Feng Liu<sup>a1</sup>, Stephen T. Ferguson<sup>a</sup>, Adam Baker<sup>a</sup>, R. Jason Pitts<sup>b</sup> and Laurence  
6 J. Zwiebel<sup>a\*</sup>

7  
8 <sup>a</sup> Department of Biological Sciences, Vanderbilt University, Nashville, TN 37235, USA

9 <sup>b</sup> Department of Biology, Baylor University, Waco, TX 76706, USA

10 <sup>1</sup> Equal contributions

11 \* Correspondence: [l.zwiebel@vanderbilt.edu](mailto:l.zwiebel@vanderbilt.edu)

12 **Abstract**

13 Anopheline mosquitoes are the sole vectors of malaria and rely on olfactory cues for  
14 host seeking in which ammonia derived from human sweat plays an essential role. To  
15 investigate the function of the *Anopheles coluzzii* ammonium transporter (*AcAmt*) in the  
16 mosquito olfactory system, we generated an *AcAmt* null mutant line using  
17 CRISPR/Cas9. *AcAmt*<sup>-/-</sup> mutants displayed a series of novel phenotypes compared with  
18 wild-type mosquitoes including significantly lower insemination rates during mating and  
19 increased mortality during eclosion. Furthermore, *AcAmt*<sup>-/-</sup> males showed significantly  
20 lower sugar consumption while *AcAmt*<sup>-/-</sup> females and pupae displayed significantly  
21 higher ammonia levels than their wild-type counterparts. Surprisingly, in contrast to  
22 previous studies in *Drosophila* that revealed that the mutation of the ammonium  
23 transporter (*DmAmt*) induces a dramatic reduction of ammonia responses in antennal  
24 coeloconic sensilla, no significant differences were observed across a range of  
25 peripheral sensory neuron responses to ammonia and other odorants between wild-type  
26 and *AcAmt*<sup>-/-</sup> females. Taken together, these data support the existence of a unique  
27 ammonia-sensing mechanism in mosquitoes and that the ammonium transporter may  
28 be an important molecular target for vector control.

29

30 .

31

32 **Keywords:** Olfaction, Ammonium transporter; *Anopheles coluzzii*; CRISPR/Cas9;  
33 Mosquito reproduction; Coeloconic sensilla.

## 34 **Key Messages**

- 35 • Mutagenesis of *An. coluzzii* ammonium transporter *AcAmt* followed by  
36 comprehensive electrophysiological investigation suggest a novel ammonia-  
37 sensing pathway in *Anopheles* mosquitoes.
- 38 • *AcAmt*<sup>-/-</sup> mutants displayed significant deficiencies in reproduction and eclosion,  
39 which are likely due to elevated ammonia levels and reduced ability of sugar  
40 feeding.
- 41 • *An. coluzzii* coeloconic sensilla primarily detect amines and acids.

## 42 **Introduction**

43 Several species of Anopheline mosquitoes make up the primary vectors of *Plasmodium*  
44 parasites that are the causative agents for human malaria resulting in hundreds of  
45 thousands of deaths worldwide every year (World Health Organization 2019). Pathogen  
46 transmission occurs exclusively as a consequence of the blood meals that female  
47 mosquitoes require in order to complete their reproductive cycles. The mosquito's  
48 olfactory system provides the ability to sense and discriminate a broad spectrum of  
49 semiochemical cues that drive host preference and seeking behaviors that ultimately  
50 lead to blood feeding (Zwiebel and Takken 2004; Carey and Carlson 2011; Montell and  
51 Zwiebel 2016). In that process, ammonia along with several carboxylic acids derived  
52 from human sweat act as attractants that promote mosquito-human interactions  
53 (Smallegange et al. 2011). Anopheline females are attracted to ammonia without the  
54 presence of other sweat-derived cues (Braks et al. 2001).

55 A complex array of molecular components, which most notably include two classes of  
56 chemosensory receptors, odorant receptors (ORs) and ionotropic receptors (IRs), are  
57 highly expressed on the antennae and other olfactory appendages of Anopheline  
58 females where they have been implicated in the neuronal sensitivity to a range of  
59 odorant stimuli (Pitts et al. 2004; Pitts et al. 2017; Sun et al. 2020). While *Ir92a* has  
60 been characterized in *Drosophila* as an ammonia receptor expressed in antennal  
61 neurons, the molecular pathway of ammonia detection in mosquitoes has remained  
62 cryptic due to the lack of a direct homolog to *Drosophila Ir92a* (Benton et al. 2009; Min  
63 et al. 2013).

64 The transportation of ammonium in bacteria, insects, and other animals occurs through  
65 the aptly named ammonium transporter (Amt) (Andrade and Einsle 2007; Tremblay and  
66 Hallenbeck 2009; Pitts et al. 2014a). While bacteria rely on Amt for both ammonium  
67 uptake and diffusion (Thomas et al. 2000; Soupene et al. 2002), in *Aedes aegypti*,  
68 *AeAmt1* expressed in the anal papillae is involved in ammonium excretion and *AeAmt1*  
69 RNAi treated larvae display significantly higher concentrations of ammonium ions in the  
70 hemolymph than wild-type mosquitoes (Chasiotis et al. 2016; Durant and Donini 2018).  
71 More recently, several studies focused on Amt revealed a novel function in mediating  
72 ammonia sensitivity in insect chemosensory systems (Menuz et al. 2014; Pitts et al.  
73 2014a; Delventhal et al. 2017). In *Drosophila melanogaster*, the ammonium transporter  
74 (*DmAmt*) is expressed in the auxiliary cells of coeloconic ac1 sensilla, in which null  
75 mutations result in a loss of antennal sensitivity to ammonia (Menuz et al. 2014).  
76 Furthermore, the expression of *DmAmt* in auxiliary cells, as opposed to the olfactory  
77 sensory neurons (OSNs), suggested it may not be a molecular sensor of ammonia but  
78 rather could be involved in ammonium clearance which prevents neuron  
79 desensitization. Studies in *Anopheles coluzzii* (formerly *An. gambiae*; Coetzee et al.  
80 2013) suggested that *AcAmt* facilitates cross-membrane transport of ammonium ions in  
81 a heterogeneous expression system (Pitts et al. 2014a), and, importantly, *AcAmt* is  
82 localized in the antennal auxiliary cells of basiconic (grooved pegs) and coeloconic  
83 sensilla (Ye et al. 2020). These data suggest there may be conserved functionality  
84 between *Drosophila* and mosquitoes, in the latter case where ammonia sensing  
85 pathways plays a substantial role in host seeking (Ye et al. 2020). Thus far, technical

86 difficulties in gene editing in *Anopheles* mosquitoes has precluded elucidation of the  
87 olfactory function of *AcAmt* *in vivo*.

88 Here we used CRISPR/Cas9 to generate an *AcAmt* null mutant line to examine the  
89 hypothesis that *AcAmt* is essential for ammonia responses in *Anopheles* mosquitoes.  
90 Surprisingly, *AcAmt* mutants failed to display a significant difference in ammonia  
91 peripheral responses in antennal single sensillum recordings (SSRs) as well as in  
92 electroantennogram (EAG) and electrolabellogram (ELG) assays compared with wild-  
93 type *An. coluzzii*. These results suggest a divergence of ammonia-sensing pathways  
94 between *Drosophila* and mosquitoes. Furthermore, we observed *AcAmt* null mutants to  
95 be dramatically less efficient in mating and pupal eclosion. A series of behavioral and  
96 biochemical assessments were undertaken to investigate the potential mechanisms  
97 underlying these behavioral defects.

98

## 99 **Material and Methods**

### 100 **Mosquito rearing**

101 *An. coluzzii* (SUA 2La/2La), previously known as *Anopheles gambiae sensu stricto* “M-  
102 form”(Coetzee et al. 2013), originated from Suakoko, Liberia, were reared using  
103 previously described protocols (Fox et al., 2001; Qiu et al., 2004). Briefly, all mosquito  
104 lines were reared at 27°C, 75% relative humidity under a 12:12 light:dark cycle (11 h  
105 ~250 lux full light, 11 h darkness, with 1 h dawn/dusk gradient transitions in between)  
106 and supplied with 10% sugar water in the Vanderbilt University Insectary (Fox et al.  
107 2001; Suh et al. 2016). Mosquito larvae were reared in 500mL distilled water with 100  
108 larvae per rearing pan. Larval food was prepared by dissolving 0.12g/mL Kaytee Koi’s

109 Choice premium fish food (Chilton, WI, US) and 0.06g/mL yeast in distilled water and  
110 incubating at 4°C overnight for fermentation. For 0- to 4-day-old larvae, 0.12mL of larval  
111 food solution was added daily into each rearing pan; for larvae  $\geq 5$  days old, 0.16mL was  
112 added.

### 113 **Mosquito mutagenesis**

114 CRISPR/Cas9 gene editing in *An. coluzzii* was carried out as previously described (Liu  
115 et al. 2020), with minor modifications. The CRISPR gene-targeting vector was a kind gift  
116 from Dr. Andrea Crisanti of Imperial College London, UK (Hammond et al. 2016). The  
117 single guide RNA (sgRNA) sequences for *AcAmt* gene *Exon 1* and *Exon 4* were  
118 designed by CHOPCHOP (<http://chopchop.cbu.uib.no/>) with high efficiency  
119 (**Supplementary Table 1**) and were synthesized (Integrated DNA Technologies,  
120 Coralville, IA) and subcloned into the CRISPR vector by Golden Gate cloning (New  
121 England Biolabs, Ipswich, MA). The homologous templates were constructed based on  
122 a pHD-DsRed vector (a gift from Kate O'Connor-Giles; Addgene plasmid #51434;  
123 <http://n2t.net/addgene:51434>; RRID:Addgene 51434), in which the 2-kb homologous  
124 arms extending either direction from the double-stranded break (DSB) sites were PCR  
125 amplified (**Supplementary Table 1**) and sequentially inserted into the *AarI* and *SapI*  
126 restriction sites on the vector, respectively.

127 The microinjection protocol was carried out as described (Pondeville et al. 2014; Ye et  
128 al. 2020). Briefly, newly laid (approximately 1-h old) embryos of the wild-type *An.*  
129 *coluzzii* were immediately collected and aligned on a filter paper moistened with 25mM  
130 sodium chloride solution. All the embryos were fixed on a coverslip with double-sided  
131 tape, and a drop of halocarbon oil 27 (Sigma-Aldrich, St. Louis, MO) was applied to

132 cover the embryos. The coverslip was further fixed on a slide under a Zeiss Axiovert 35  
133 microscope with a 40X objective (Zeiss, Oberkochen, Germany). The microinjection  
134 was performed using Eppendorf FemtoJet 5247 and quartz needles (Sutter Instrument,  
135 Novato, CA). The gene targeting vectors at 300ng/ $\mu$ L were co-injected with the  
136 homologous template at 300ng/ $\mu$ L. The injected embryos were placed into deionized  
137 water with artificial sea salt (0.3g/L) and reared under lab conditions.

138 First-generation (G0) injected adults were separated based on sex and crossed with 5X  
139 wild-type sex counterparts. Their offspring (F1) were screened for DsRed-derived red  
140 eye fluorescence. Red-eyed F1 males were individually crossed with 5X wild-type  
141 females to establish a stable mutant line. PCR analyses of all individuals were  
142 performed (after mating) to validate the fluorescence marker insertion using primers that  
143 cover the DSB site (**Supplementary Table 1**). The PCR products were further  
144 sequenced to confirm the accurate insertion. The heterozygous mutant lines were back-  
145 crossed with the wild-type partners for at least eight generations before putative  
146 homozygous individuals were manually screened for DsRed-derived red-eye  
147 fluorescence intensity. Putative homozygous mutant individuals were mated to each  
148 other before being sacrificed for genomic DNA extraction and PCR analyses (as above)  
149 to confirm their genotypes.

#### 150 **Single sensillum recording (SSR)**

151 SSR was carried out as previously described (Liu et al. 2013) with minor modifications.  
152 Non-blood-fed female mosquitoes (4-10 days post-eclosion) were mounted on a  
153 microscope slide (76 x 26 mm) (Ghaninia et al. 2007). The antennae were fixed using  
154 double-sided tape to a cover slip resting on a small bead of dental wax to facilitate



155 manipulation, and the cover slip was placed at approximately 30 degrees to the  
156 mosquito head. Once mounted, the specimen was placed under an Olympus BX51WI  
157 microscope and the antennae viewed at high magnification (1000X). Two tungsten  
158 microelectrodes were sharpened in 10% KNO<sub>2</sub> at 10 V. The grounded reference  
159 electrode was inserted into the compound eye of the mosquito using a WPI  
160 micromanipulator, and the recording electrode was connected to the preamplifier (10X,  
161 Syntech) and inserted into the shaft of the olfactory sensillum to complete the electrical  
162 circuit to extracellularly record OSN potentials (Den Otter et al. 1980). Controlled  
163 manipulation of the recording electrode was performed using a Burleigh  
164 micromanipulator (Model PCS6000). The preamplifier was connected to an analog-to-  
165 digital signal converter (IDAC-4, Syntech), which in turn was connected to a computer  
166 for signal recording and visualization.

167 Stock odorants of highest available purity were diluted in paraffin oil to make 10<sup>-2</sup> (v/v)  
168 working solutions. Ammonium hydroxide (Sigma-Aldrich, St. Louis, MO) was serially  
169 diluted in water to 0.01, 0.05, 0.1, 0.5, 1, and 5% ammonia solutions. For each odorant,  
170 a 10- $\mu$ L aliquot was applied onto a filter paper (3 x 50mm), which was then inserted into  
171 a Pasteur pipette to create the stimulus cartridge. A sample containing the solvent  
172 (water/paraffin oil) alone served as the control. The airflow across the antennae was  
173 maintained at a constant 20 mL/s throughout the experiment. Purified and humidified air  
174 was delivered to the preparation through a glass tube (10-mm inner diameter)  
175 perforated by a small hole 10cm away from the end of the tube into which the tip of the  
176 Pasteur pipette could be inserted. The stimulus was delivered to the sensilla by  
177 inserting the tip of the stimulus cartridge into this hole and diverting a portion of the air

178 stream (0.5L/min) to flow through the stimulus cartridge for 500ms using a stimulus  
179 controller (Syntech). The distance between the end of the glass tube and the antennae  
180 was  $\leq 1$ cm. Signals were recorded for 10s starting 1s before stimulation, and the action  
181 potentials were counted off-line over a 500-ms period before and after stimulation.  
182 Spike rates observed during the 500-ms stimulation were subtracted from the  
183 spontaneous activities observed in the preceding 500ms and counts recorded in units of  
184 spikes/sec.

### 185 **Electroantennogram (EAG) and Electrolabellogram (ELG)**

186 The EAG and ELG protocols were derived from previous studies (Kwon et al. 2006; Suh  
187 et al. 2016; Sun et al. 2020). Briefly, a non-blood-fed, 5- to 10-day-old female mosquito  
188 was decapitated with forceps. Two sharp borosilicate glass (1B100F-3; World Precision  
189 Instruments, Sarasota, FL) electrodes were prepared using an electrode puller (P-2000;  
190 Sutter Instruments, Novato, CA) and filled with Ringer solution (96mM NaCl, 2mM KCl,  
191 1mM MgCl<sub>2</sub>, 1mM CaCl<sub>2</sub>, 5mM HEPES, pH = 7.5), in which a AgCl-coated sliver wire  
192 was placed in contact to complete a circuit with a reference electrode inserted into the  
193 back of the head. Antennal/labellar preparations were continuously exposed to a  
194 humidified air flow (1.84L/min) transferred through a borosilicate glass tube (inner  
195 diameter = 0.8cm) that was exposed to the preparation at a distance of 10mm. Stimulus  
196 cartridges were prepared by transferring 10 $\mu$ l of test or control stimuli solutions to filter  
197 paper (3 x 50mm), which was then placed inside a 6-inch Pasteur pipette. Odorant  
198 stimuli were delivered to antennal preparations for 500ms through a hole placed on the  
199 side of the glass tube located 10cm from the open end of the delivery tube (1.08L/min),  
200 where it was mixed with the continuous air flow using a dedicated stimulus controller

201 (Syntech, Hilversum, The Netherlands). An air flow (0.76L/min) was simultaneously  
202 delivered from another valve through a blank pipette into the glass tube at the same  
203 distance from the preparation in order to minimize changes in flow rate during odor  
204 stimulation. The resulting signals were amplified 10x and imported into a PC via an  
205 intelligent data acquisition controller (IDAC-232; Syntech, Hilversum, The Netherlands)  
206 interface box, and the recordings were analyzed offline using EAG software (EAG  
207 Version 2.7, Syntech, Hilversum, The Netherlands). Maximal response amplitudes of  
208 each test stimuli were normalized after dividing by the control (solvent alone)  
209 responses.

#### 210 **Pupation and eclosion rate quantification**

211 Each replicate consisted of 80-100 newly hatched 1<sup>st</sup> instar larvae reared under the  
212 same conditions with a density of 10 larvae/50 $\mu$ L dH<sub>2</sub>O. Pupae from each replicate were  
213 then collected into a mosquito bucket and allowed to eclose. Total pupae were counted  
214 and divided by the initial 1<sup>st</sup> instar larval counts to calculate the pupation rate. The  
215 successfully eclosed adults were counted and divided by the pupal counts to measure  
216 the eclosion success rate.

#### 217 **Mating bioassay**

218 Newly emerged wild-type females and males were separated for 1 day. 15 females and  
219 10 males were then placed in a rearing bucket and allowed to freely mate for 5 days. All  
220 surviving females were then collected and their spermathecae were dissected under a  
221 compound microscope. The spermathecae were then placed in the buffer (145mM  
222 NaCl, 4mM KCl, 1mM MgCl<sub>2</sub>, 1.3mM CaCl<sub>2</sub>, 5mM D-glucose, 10mM HEPES) (Pitts et  
223 al. 2014b) with 300nM DAPI and a cover slip was used to gently press and break the

224 spermathecae to release the sperm. The spermathecae were examined to assess the  
225 insemination status under a 1000X compound microscope (BX60; Olympus, Tokyo,  
226 Japan). The insemination rate was calculated by dividing the number of inseminated  
227 females by the total number of females in each bucket.

### 228 **Mosquito locomotor activity bioassay**

229 Individual adult mosquitoes (3- to 9-days old) were first anesthetized on ice, then placed  
230 in wells of a six-well CytoOne tissue-culture plate (CC7672-7506; USA Scientific, Ocala,  
231 FL), and thereafter allowed to recover for at least 30 min prior to trial start. The wells  
232 were supplied with a cotton ball soaked in 0.5mL of 10% sugar water. Activity was  
233 digitally recorded and analyzed starting at ZT12 (the onset of the dark cycle) and  
234 continued through to ZT17. Activity recordings were collected with VideoVelocity  
235 software (v3.7.2090, Vancouver, Canada) at one image per second using a USB  
236 camera (Spinel, Newport Beach, CA) with built-in 850nm IR light placed ~20cm above  
237 the six-well plate.

238 Digital recordings were analyzed *post hoc* using EthoVision software (v8.5, Noldus,  
239 Wageningen, NL) to generate the following activity/mobility parameters: (1) distance  
240 travelled, defined as movement of the center-point of the animal (cm); (2) time spent  
241 moving relative to time spent not moving using the following parameters defined  
242 according to the software: averaging interval, 1 sample; start velocity, 1.00cm/s; stop  
243 velocity, 0.90cm/s; (3) clockwise and counterclockwise turns, defined as a cumulative  
244 turn angle of 180° with a minimum distance travelled by the animal of at least 0.5cm,  
245 with turns in the opposite direction of less than 45.00° ignored; and (4) time the  
246 mosquito spent in the half of the well containing the sugar water.

## 247 **Capillary feeder (CAFE) bioassay**

248 The CAFE bioassay was conducted following a previous study with minor modifications  
249 (Dennis et al. 2019). Each trial started at ZT12 and ended at ZT18 for 6h. Four 4- to 8-  
250 day-old mosquitoes were provided with water but otherwise fasted for 22h before being  
251 anesthetized on ice briefly and placed into a *Drosophila* vial (24.5mm x 95mm; Fisher  
252 Scientific, Waltham, MA). A borosilicate glass capillary (1B100F-3; World Precision  
253 Instruments, Sarasota, FL) was filled with 10% sucrose water and embedded into a  
254 cotton plug. The vial opening was then blocked with the cotton plug and the capillary  
255 was placed slightly protruding from the plug into the vial for mosquitoes to feed on. The  
256 sugar level in the capillary was compared before and after each trial to generate the  
257 initial sugar consumption value. At least four control vials with no mosquitoes inside  
258 were used to assess the evaporation at the same time. The final sugar consumption  
259 was calculated by subtracting the evaporation from the initial sugar consumption value.

## 260 **Mass measurements**

261 Individual 3- to 6-day-old mosquitoes were briefly anesthetized on ice and weighed  
262 using a XSR Analytical Balance (Mettler Toledo, Columbus, OH).

## 263 **Ammonia quantifications**

264 The total ammonia content of adult and pupal stage *An. coluzzii* was assessed  
265 according to (Scaraffia et al. 2005) with minor modifications. Here, two 3- to 5-day-old  
266 adults or a single  $\geq 1$ -day-old pupa were homogenized in 150 $\mu$ L distilled water and  
267 centrifuged at max speed in a table centrifuge for 2min at 4°C. 100 $\mu$ L supernatant was  
268 used for ammonia level measurement following the manufacturer's instructions of the  
269 Ammonia Reagent Set (Pointe Scientific, Canton, MI) (Scaraffia et al. 2005).The

270 absorbance was read at 340nm wavelength using a SmartSpec 3000  
271 spectrophotometer (Bio-Rad, Hercules, CA) and compared with an ammonia standard  
272 curve prepared with ammonium chloride to calculate the ammonia concentration.

### 273 **Carbohydrate quantification**

274 The total carbohydrate content of adult and pupal stage *An. coluzzii* was assessed  
275 according to (Ahmed 2013; Ellison et al. 2015) with minor modifications. Here, four 3- to  
276 6-day-old mosquitoes or  $\geq 1$ -day-old pupae were collected between ZT11 and ZT12 and  
277 homogenized in 200 $\mu$ L ddH<sub>2</sub>O; the homogenate was centrifuged at maximum speed for  
278 1min at 4°C. 10 $\mu$ L of the supernatant was collected from the homogenate and added to  
279 a phenol solution of 195 $\mu$ L ddH<sub>2</sub>O and 5 $\mu$ L 100% phenol. 500 $\mu$ L sulfuric acid was  
280 subsequently added to the solution and briefly vortexed. The colorimetric reaction stood  
281 at room temperature for 10min and then the absorbance was read at 490nm wavelength  
282 using a SmartSpec 3000 spectrophotometer (Bio-Rad, Hercules, CA). The absorbance  
283 was compared with a standard curve prepared with glucose to calculate the  
284 carbohydrate content.

285

## 286 **Results**

### 287 **Generation of the *AcAmt* null mutant**

288 A complete *AcAmt* null mutant strain was generated using CRISPR/Cas9 gene editing  
289 via embryonic microinjection of two targeting plasmids expressing Cas9 and dual  
290 sgRNAs along with a homology template to knock-in a *3xP3-DsRed* eye-specific red  
291 fluorescence marker between two *AcAmt* DSB sites (Liu et al. 2020). The two sgRNAs

292 targeted sequences at the start of both *Exon 1* and *Exon 4* to remove the majority of the  
293 three exons in between the DSBs of the *AcAmt* coding region (**Supplementary Table**  
294 **1**). The 2kb homology arms were designed to extend outward from the two DSB sites to  
295 insert the *3xP3-DsRed* fluorescence marker (**Figure 1A**). The successful knock-  
296 out/knock-in was molecularly confirmed in progeny using both PCR (**Figure 1B**) and  
297 DNA sequencing. Homozygous and heterozygous individuals from subsequent  
298 backcross generations were selected based on the intensity of red fluorescence that  
299 directly correlates to the copy number of *3xP3-DsRed* alleles.

### 300 **Olfactory responses to ammonia**

301 *AcAmt* expression has been localized to ammonia-sensitive antennal coeloconic  
302 sensilla and grooved pegs (Ye et al. 2020), which corresponds to the ammonia-sensing  
303 deficit in ac1 sensilla in *Drosophila* (Menuz et al. 2014). Here, SSR studies were carried  
304 out to examine whether responses to ammonia in these sensilla are affected by the  
305 *AcAmt*<sup>-/-</sup> mutation (**Figure 2A&2B**). Surprisingly, and in contrast to the significant  
306 electrophysiological deficits observed in *DmAmt*<sup>-/-</sup> mutants (Menuz et al. 2014),  
307 indistinguishable dose-dependent responses to ammonia were observed in coeloconic  
308 sensilla (**Figure 2C**) and grooved pegs (**Figure 2D**) in both wild-type and *AcAmt*<sup>-/-</sup>  
309 females. Sensillar responses to repeated stimulations of ammonia were also assessed  
310 in order to saturate the sensillar lymph and potentially uncover a requirement for the  
311 putative clearance function of Amt (Menuz et al. 2014). Despite this additional  
312 challenge, no significant differences were observed in SSR responses across  
313 coeloconic sensilla (**Figure 2E**) and grooved pegs (**Figure 2F**) in wild-type and *AcAmt*<sup>-/-</sup>  
314 female antennae. To investigate whether the *AcAmt*<sup>-/-</sup> mutation alters sensillar

315 responses to other odorants, we characterized the response profiles of coeloconic  
316 sensilla to an odorant panel of amines, acids, ketones, aldehydes, and alcohols (**Figure**  
317 **3A**). Most amines and acids evoked strong, albeit not significantly different, responses  
318 in wild-type and *AcAmt*<sup>-/-</sup> females (**Figure 3B**), as opposed to the weak responses  
319 elicited by other general odorants (**Figure 3C**).

320 Transcuticular EAG studies were also used to examine peripheral dose-dependent  
321 responses to ammonia at the whole-appendage level. Inasmuch as wild-type EAG  
322 responses to ammonia displayed both depolarization (downward) and hyperpolarization  
323 (upward) deflections relative to baseline (**Figure 4A**), these data were analyzed across  
324 both components. Once again, no significant differences were observed in dose-  
325 dependent antennal responses to ammonia (**Figure 4B&4C**) nor in response to the  
326 positive controls 1-octen-3-ol (**Figure 4D**) and butylamine (**Figure 4E**) which display  
327 robust dose-dependent depolarizations in both mutant and wild-type mosquitoes.  
328 Together, these data suggest ammonia responses across the antennae are not altered  
329 in *AcAmt*<sup>-/-</sup> females. We also examined the role of *AcAmt* in peripheral responses to  
330 ammonia on the mosquito labella where it is also highly expressed (Pitts et al. 2014a;  
331 Ye et al. 2020) using ELG recording preparations. As was the case for the antennae,  
332 these studies demonstrated that both wild-type and *AcAmt*<sup>-/-</sup> female labella display  
333 dose-dependent responses to ammonia with no significant differences (**Figure 4F**).

### 334 **Reproductive deficits in *AcAmt* null mutants**

335 In contrast to the absence of mutant olfactory phenotypes in response to ammonia,  
336 *AcAmt*<sup>-/-</sup> mutants displayed a broad range of deficits associated with reproductive fitness  
337 and fecundity that resulted in a striking difficulty to propagate the *AcAmt*<sup>-/-</sup> mutant line.



338 To assess this issue, we utilized a simple group mating bioassay (**Figure 5A**) to  
339 quantify female insemination rates (**Figure 5B**) which uncovered significant mating  
340 deficits in *AcAmt*<sup>-/-</sup> mutants compared with the wild-type and *AcAmt*<sup>+/-</sup> heterozygotes  
341 (**Figure 5C**). Importantly, this phenotype is not sex-specific as these mating deficits  
342 persist when pairing either female or male *AcAmt*<sup>-/-</sup> mosquitoes with wild-type  
343 counterparts (**Figure 5C**). In order to investigate whether these phenotypes derived  
344 from shared or sex-independent mechanisms, we first examined male-specific  
345 processes such as sperm mobility. Here, *AcAmt*<sup>+/-</sup> males, which produce both mutant  
346 and wild-type spermatozoa, were crossed with wild-type females thereby allowing the  
347 wild-type sperm to compete with mutant sperm throughout reproduction which is a multi-  
348 step process comprising insemination (i.e., the delivery of sperm to the female  
349 spermatheca) as well as subsequent sperm activation and oocyte fertilization. In this  
350 context, we quantified the number of heterozygous versus wild-type larvae distinguished  
351 by means of DsRed-derived fluorescence. In these studies, the consistent ratios of  
352 larval progeny showed there is no significant difference between the wild-type and  
353 *AcAmt* mutant sperm (**Figure 5D**). This suggests that the *AcAmt*<sup>-/-</sup> mating deficits may  
354 be due to a reduction of the frequency of successful copulation, which raises the  
355 potential of broader deficits in overall metabolism that in turn impact general activity  
356 levels.

357 To assess activity profiles, individual male and female adult mosquitoes were digitally  
358 recorded in the scotophase between ZT12 and ZT17, which encompasses the peak  
359 period for Anopheline mating (Charlwood and Jones 1980; Howell and Knols 2009), and  
360 subsequently analyzed across several activity/mobility parameters, including distance

361 travelled, the proportion of time spent near sugar water, the proportion of time spent  
362 moving, and the sum of clockwise and counterclockwise turns. Across the entire trial,  
363 both wild-type and *AcAmt*<sup>-/-</sup> mutant females displayed a burst of activity within the first  
364 hour of the scotophase, followed by a prolonged period of relative quiescence (**Figure**  
365 **6A**). Although the mean distance travelled over the full duration of the trial was relatively  
366 lower in males than females, a similar trend of activity and quiescence was also  
367 observed in both wild-type and *AcAmt*<sup>-/-</sup> mutant males (**Figure 6B**). Furthermore, an  
368 analysis of all the activity/mobility parameters examined across the full duration of the  
369 bioassay failed to indicate any significant differences between wild-type or *AcAmt*<sup>-/-</sup>  
370 mutant genotypes for either female or male adult mosquitoes (**Figure 6C-6J**). That said,  
371 these cumulative data largely reflect the prolonged period of inactivity, resulting in mean  
372 values that tend to converge the longer the mosquitoes remain inactive (**Figure**  
373 **6A&6B**).

374 Inasmuch as the majority of mating in *An. coluzzii* occurs proximate to the dusk  
375 transition at start of the scotophase (Charlwood and Jones 1980; Howell and Knols  
376 2009), we looked for more nuanced differences within this initial window. Here, wild-type  
377 females appeared to be more active within the first 10 min of the scotophase, while  
378 *AcAmt*<sup>-/-</sup> mutant females manifested a modest latency in movement, which subsequently  
379 was higher than the wild-type females (**Figure 6A**). To address this more formally, we  
380 statistically analyzed activity levels within two discrete 10-min intervals that together  
381 represent the initial 20 min of the dark component of the light:dark cycle (ZT1200-1220).  
382 In this interval, while female mosquitoes showed no significant difference in the time  
383 spent near the sugar water, a significant interaction effect was observed between

384 genotype and time with respect to distance moved ( $F(1, 16) = 26.28, P = 0.0001$ ), the  
385 proportion of time spent moving ( $F(1, 16) = 27.99, P < 0.0001$ ), and turning frequency  
386 ( $F(1, 16) = 24.59, P = 0.0001$ ) (**Figure 6K-6L&6O-6P**). In males, apart from a modest  
387 but nevertheless significant ZT-dependent effect on turning frequency, in which both  
388 wild-type and *AcAmt*<sup>-/-</sup> mutants turned more frequently in the ZT1210-ZT1220 interval  
389 than in ZT1200-ZT1210, no differences were observed (**Figure 6M-6N&6Q-6R**). Taken  
390 together, these results suggest that there are significant differences in activity levels  
391 between wild-type and *AcAmt*<sup>-/-</sup> mutant females that correspond to the onset of the dark  
392 cycle and the peak period of mating (Charlwood and Jones 1980; Howell and Knols  
393 2009). Specifically, *AcAmt*<sup>-/-</sup> mutant females experience a delay in activity compared  
394 with their wild-type counterparts, which are most active at the onset of the dark cycle;  
395 this may contribute to mating deficiencies during this critical time window by  
396 desynchronization of peak activity between the sexes.

### 397 **Eclosion phenotypes**

398 In addition to mating phenotypes, we also observed an interesting developmental deficit  
399 characterized by a significantly higher level of pharate mortality during eclosion of  
400 pupae to adults in *AcAmt*<sup>-/-</sup> mutants compared with wild-type individuals raised under  
401 identical conditions and larval density levels (**Figure 7A&7B**). This phenotype does not  
402 appear to have a gender bias as approximately equal ratios of male and female *AcAmt*<sup>-/-</sup>  
403 mosquitoes are represented in the reduced numbers of adults that nevertheless survive.  
404 Furthermore, *AcAmt*<sup>-/-</sup> mosquitoes displayed the same pupation rate (**Figure 7C**) and  
405 general development timing as their wild-type and *AcAmt*<sup>+/-</sup> counterparts, supporting the  
406 view that *AcAmt* mutations do not significantly influence larval or pupal stage

407 development. Instead, these data suggest that post-eclosion reduction in viable *AcAmt*<sup>-/-</sup>  
408 adults results exclusively from the failure of pharate adult *AcAmt*<sup>-/-</sup> mutants to  
409 successfully eclose and fully emerge from their pupal cases. Taken together with the  
410 broad mating deficits of *AcAmt*<sup>-/-</sup> mutants, these phenotypes raise the possibility that  
411 these mutants have an inability to effectively excrete or otherwise manage metabolic  
412 ammonia during these two intensively active processes resulting in toxic levels of  
413 ammonia that ultimately impact these critical behaviors.

#### 414 **Elevated ammonia levels in *AcAmt* null mutants**

415 RNAi-mediated silencing of *AeAmt1* has been shown to induce elevation of ammonia  
416 levels in the larval hemolymph of *Ae. aegypti* (Chasiotis et al. 2016). In order to assess  
417 this possibility in our *AcAmt*<sup>-/-</sup> mutants, we used a simple colorimetric reagent to  
418 enzymatically measure whole-body ammonia levels in mating-stage adults and late-  
419 stage pupae (**Figure 8A**). These quantitative data indicate that while there was no  
420 alteration in ammonia levels for adult males regardless of genotype, mating-stage  
421 *AcAmt*<sup>-/-</sup> females exhibited significantly higher levels of ammonia than wild-type females  
422 or *AcAmt*<sup>+/-</sup> heterozygotes that displayed intermediate levels of ammonia (**Figure 8B**).  
423 Similarly, significant increases in ammonia levels were detected in unsexed late-stage  
424 *AcAmt*<sup>-/-</sup> pupae relative to wild-type or *AcAmt*<sup>+/-</sup> heterozygote counterparts (**Figure 8C**).

#### 425 **Sugar feeding and carbohydrate levels in *AcAmt* mutants**

426 The mating/eclosion phenotypes may also be the result of a potential defect in energy  
427 content and/or sugar feeding that play an essential role in mosquito mating and other  
428 behaviors (Gary et al. 2009). To examine this, we used a modified capillary feeder  
429 (CAFE) bioassay (**Figure 9A**) to measure adult sugar feeding during the same ZT12-

430 ZT18 interval when Anopheline mating is most likely to occur (Howell and Knols 2009).  
431 In these studies, only *AcAmt*<sup>-/-</sup> males exhibited a significantly lower sugar consumption  
432 than the wild-type and *AcAmt*<sup>+/-</sup> males (**Figure 9B**). Water-only CAFE controls were also  
433 conducted, which demonstrated that the male-specific defect is restricted to sugar  
434 feeding (**Figure 9C**).

435 To further examine the potential impact of sugar feeding deficits on adult mating and  
436 pupal eclosion, respectively, we collected adults at ZT11 just before the onset of mating  
437 and late-stage pupae 12h before eclosion and used the phenol-sulfuric acid method  
438 (Ahmed 2013; Ellison et al. 2015) to assess whole-body carbohydrate levels across  
439 wild-type and *AcAmt* mutant genotypes. Once again, while there were no significant  
440 differences across adult male genotypes, *AcAmt*<sup>-/-</sup> females exhibited significantly lower  
441 total carbohydrate content than wild-type or the intermediate levels seen in *AcAmt*<sup>+/-</sup>  
442 heterozygotes (**Figure 10A&10B**). In order to control for larger individuals artifactually  
443 accounting for these higher carbohydrate contents, mosquitoes were sampled and  
444 weighed prior to homogenization. Correspondingly, this analysis revealed that both  
445 *AcAmt*<sup>-/-</sup> and *AcAmt*<sup>+/-</sup> females weighed significantly less than wild-type females (**Figure**  
446 **10C**), which suggests their lower carbohydrate contents may, in part, reflect this  
447 physical characteristic.

448

## 449 **Discussion**

450 In *Drosophila*, *DmAmt* null mutants demonstrated a dramatic reduction of ac1 sensilla  
451 responses to ammonia where *DmAmt* is expressed in auxiliary cells and hypothesized  
452 to be involved in ammonium clearance (Menuz et al. 2014), while no such phenotype

453 was observed in the labella where *DmAmt* is exclusively neuronal (Delventhal et al.  
454 2017). We now report a comprehensive investigation in the malaria vector mosquito *An.*  
455 *coluzzii* of *AcAmt* null mutant olfactory responses to ammonia. This analysis  
456 encompasses both antennal grooved pegs and coeloconic sensilla, where *AcAmt* is  
457 primarily expressed in auxiliary cells, as well as the labella where *AcAmt* was observed  
458 in olfactory and non-olfactory neurons (Ye et al. 2020). In contrast to *Drosophila*, no  
459 significant reduction of peripheral neuron sensitivity to ammonia was found in either  
460 antennae or labella of *AcAmt*<sup>-/-</sup> mutants. It is noteworthy that, in addition to *AcAmt*,  
461 another ammonium transporter, *Rh50*, is highly expressed on the mosquito antennae  
462 (Pitts et al. 2014a), which in light of these data is to likely play a complementary role in  
463 the ammonia-sensing and management pathways. This is consistent with a previous  
464 study in *Drosophila*, in which ammonia responses in ac3 and ac4 sensilla on female  
465 antennae where *DmRh50* is expressed were not impacted by the *DmAmt* mutation  
466 (Menuz et al. 2014).

467 While the receptors and other components underlying ammonia-sensing mechanisms in  
468 the mosquito olfactory system remain unknown, attraction to ammonia plays a  
469 significant role in host-seeking behaviors by *Anopheles* females (Braks et al. 2001;  
470 Smallegange et al. 2005). This makes it likely that sensitivity to ammonia is sufficiently  
471 essential in anautogenous mosquitoes to drive the evolution of parallel and  
472 complementary ammonia sensitivity processes. In light of the lack of *AcAmt*<sup>-/-</sup> deficits in  
473 *An. coluzzii* olfaction, comprehensive localization and characterization of the ammonium  
474 transporter *Rh50* will be critically informative. Indeed, it is reasonable to speculate that

475 significant impairment of olfactory responses to ammonia might require mutations of  
476 both *AcAmt* and *Rh50*.

477 In addition to the peripheral olfactory responses to ammonia, ammonium transporters  
478 have recently been shown to be involved in other essential functions in the biology of  
479 insects including male fertility in *Ae. aegypti* (Durant and Donini 2020) and larval muscle  
480 control in *Drosophila* (Lecompte et al. 2020). Here, CRISPR/Cas9-induced *AcAmt*<sup>-/-</sup>  
481 mutations similarly uncover several potentially non-olfactory phenotypes in *An. coluzzii*  
482 that are likely to significantly reduce the overall fitness of these mutants. Even so, while  
483 significant fecundity deficits are reported here in *AcAmt*<sup>-/-</sup> mutants and *AeAmt* RNAi  
484 treatments in *Ae. aegypti* (Durant and Donini 2020), these phenotypes are likely to  
485 result from fundamentally different mechanisms working synergistically. In *An. coluzzii*,  
486 the frequency of successful copulation (sperm delivery) is significantly reduced in both  
487 *AcAmt*<sup>-/-</sup> females and males, while the decrease of fecundity in *Ae. aegypti* appears to  
488 be due to a significant reduction in viable spermatozoa (Durant and Donini 2020).  
489 Importantly, this latter phenotype is specifically not observed in *An. coluzzii* mating  
490 studies. Instead, data reported here suggest that the absence of *AcAmt* results in subtle  
491 but nevertheless significantly altered activity profiles during the circadian interval most  
492 associated with mating (Charlwood and Jones 1980; Howell and Knols 2009). Even  
493 more compelling is the *AcAmt*-dependent elevation of endogenous ammonia levels that  
494 may rise above physiologically toxic thresholds in mating-stage adults and late-stage  
495 pupae as the likely mechanism responsible for these mating as well as the eclosion  
496 deficits we report. This rationale aligns with increased ammonia levels and hemolymph  
497 acidification found in *Ae. aegypti* larvae treated with *AeAmt/AeRh50*-targeted RNAi

498 (Chasiotis et al. 2016; Durant et al. 2017; Durant and Donini 2018) and suggests that  
499 *AcAmt* is similarly involved in ammonia management/excretion systems in *Anopheles*  
500 mosquitoes. This is consistent with our recent hypothesis implicating *AcAmt* in neural  
501 toxicity and ammonia homeostasis (Ye et al. 2020).

502 During mating, both male and female mosquitoes monitor each other's wing beat  
503 frequency to actively modulate these activities toward convergence (Gibson and Russell  
504 2006; Cator et al. 2009; Robert 2009; Gibson et al. 2010). This auditory interaction  
505 between females and males has been suggested to serve an important role in  
506 conspecific mating recognition and, in that context, directly contributes to mosquito  
507 reproductive fitness (Cator et al. 2009; Robert 2009). This has indeed been shown to  
508 contribute to the reproductive isolation between "M" and "S" forms of *An. gambiae* now  
509 recognized as distinct species (Coetzee et al. 2013), which utilize wing beat frequency  
510 to recognize potential mates within their own molecular form/species (Pennetier et al.  
511 2010). Notably, this mating interaction requires not only auditory interactions, but also  
512 the coordination of wing movement to match the frequencies of corresponding partners  
513 (Robert 2009). While uncharacterized in mosquitoes, *Drosophila* leg and wing muscles  
514 are innervated with glutamatergic neurons, and, not surprisingly, the malfunction of  
515 these neurons impairs fly movement (Sadaf et al. 2015; Gowda et al. 2018). Inasmuch  
516 as *Anopheles* mosquitoes rely on muscle coordination to achieve a matching of wing-  
517 beat frequencies between females and males for mating recognition (Pennetier et al.  
518 2010), the absence of *AcAmt* function may impact neuronal function to impair muscle  
519 control and the auditory/wing beat frequency convergence required during mating.



520 With regard to the eclosion deficits displayed by *AcAmt* mutants, it is reasonable to  
521 conclude that successful emergence from the pupal case requires similarly substantial  
522 muscular coordination and effort such that failure to physiologically manage  
523 ammonia/acid levels could well be lethal.

524 It appears likely that multiple complementary systems exist in mosquitoes to ensure  
525 ammonia detection, which is critical for host seeking and reproduction. Similarly, it  
526 seems likely that *Amts*, *Rh50s*, as well as other cryptic ammonium transporters are  
527 involved in distinct functional pathways where they play essential roles in supporting  
528 locomotion and behavior. Taken together with our recent *AcAmt* localization study (Ye  
529 et al. 2020), the CRISPR/Cas9-mediated genome-editing studies reported here suggest  
530 that *AcAmt* is functional across a variety of systems that involve olfaction, reproduction,  
531 and ammonia metabolism. Whereas further integrative studies on different ammonium  
532 transporter genes will doubtlessly reveal more detail regarding these functions, the  
533 broad footprint of *AcAmt* activity, especially insofar as its impact on mosquito fecundity,  
534 supports its role as an important target for the development of novel vector-control  
535 strategies.

536 **Literature Cited**

537 Ahmed AM (2013) Mosquito autogeny in *Aedes caspius* (Diptera: Culicidae): Alterations  
538 of larval nourishments reservation upon bacterial infection. *Insect Sci.*

539 <https://doi.org/10.1111/j.1744-7917.2012.01544.x>

540 Andrade SLA, Einsle O (2007) The Amt/Mep/Rh family of ammonium transport proteins  
541 (Review). *Mol Membr Biol* 24:357–365.

542 <https://doi.org/10.1080/09687680701388423>

543 Benton R, Vannice KS, Gomez-Diaz C, Vosshall LB (2009) Variant ionotropic glutamate  
544 receptors as chemosensory receptors in *Drosophila*. *Cell* 136:149–162.

545 <https://doi.org/10.1016/j.cell.2008.12.001>

546 Braks MAH, Meijerink J, Takken W (2001) The response of the malaria mosquito,  
547 *Anopheles gambiae*, to two components of human sweat, ammonia and L-lactic  
548 acid, in an olfactometer. *Physiol Entomol* 26:142–148.

549 <https://doi.org/10.1046/j.1365-3032.2001.00227.x>

550 Carey AF, Carlson JR (2011) Insect olfaction from model systems to disease control.  
551 *Proc Natl Acad Sci U S A* 108:12987–12995.

552 <https://doi.org/10.1073/pnas.1103472108>

553 Cator LJ, Arthur BJ, Harrington LC, Hoy RR (2009) Harmonic convergence in the love  
554 songs of the dengue vector mosquito. *Science* (80) 323:1077–1079.

555 <https://doi.org/10.1126/science.1166541>

556 Charlwood JD, Jones MDR (1980) Mating in the mosquito, *Anopheles gambiae* s.l. II.  
557 Swarming behaviour. *Physiol Entomol* 5:315–320. <https://doi.org/10.1111/j.1365->

558 3032.1980.tb00241.x

559 Chasiotis H, Ionescu A, Misyura L, et al (2016) An animal homolog of plant Mep/Amt  
560 transporters promotes ammonia excretion by the anal papillae of the disease vector  
561 mosquito *Aedes aegypti*. J Exp Biol 219:1346–1355.  
562 <https://doi.org/10.1242/jeb.134494>

563 Coetzee M, Hunt RH, Wilkerson R, et al (2013) *Anopheles coluzzii* and *Anopheles*  
564 *amharicus*, new members of the *Anopheles gambiae* complex. Zootaxa 3619:246–  
565 274. <https://doi.org/10.11646/zootaxa.3619.3.2>

566 Delventhal R, Menuz K, Joseph R, et al (2017) The taste response to ammonia in  
567 *Drosophila*. Sci Rep 7:. <https://doi.org/10.1038/srep43754>

568 Den Otter CJ, Behan M, Maes FW (1980) Single cell responses in female *Pieris*  
569 *brassicae* (Lepidoptera: Pieridae) to plant volatiles and conspecific egg odours. J  
570 Insect Physiol 26:465–472. [https://doi.org/10.1016/0022-1910\(80\)90117-1](https://doi.org/10.1016/0022-1910(80)90117-1)

571 Dennis EJ, Goldman O V., Vosshall LB (2019) *Aedes aegypti* mosquitoes use their legs  
572 to sense DEET on contact. Curr Biol 29:1551-1556.e5.  
573 <https://doi.org/10.1016/j.cub.2019.04.004>

574 Durant AC, Chasiotis H, Misyura L, Donini A (2017) *Aedes aegypti* Rhesus  
575 glycoproteins contribute to ammonia excretion by larval anal papillae. J Exp Biol  
576 220:588–596. <https://doi.org/10.1242/jeb.151084>

577 Durant AC, Donini A (2018) Ammonia excretion in an osmoregulatory syncytium is  
578 facilitated by AeAmt2, a novel ammonia transporter in *Aedes aegypti* larvae. Front  
579 Physiol 9:. <https://doi.org/10.3389/fphys.2018.00339>

- 580 Durant AC, Donini A (2020) Ammonium transporter expression in sperm of the disease  
581 vector *Aedes aegypti* mosquito influences male fertility. Proc Natl Acad Sci U S A  
582 117:29712–29719. <https://doi.org/10.1073/pnas.2011648117>
- 583 Ellison HE, Estévez-Lao TY, Murphree CS, Hillyer JF (2015) Deprivation of both  
584 sucrose and water reduces the mosquito heart contraction rate while increasing the  
585 expression of nitric oxide synthase. J Insect Physiol 74:1–9.  
586 <https://doi.org/10.1016/j.jinsphys.2015.01.011>
- 587 Fox AN, Pitts RJ, Robertson HM, et al (2001) Candidate odorant receptors from the  
588 malaria vector mosquito *Anopheles gambiae* and evidence of down-regulation in  
589 response to blood feeding. Proc Natl Acad Sci U S A 98:14693–14697.  
590 <https://doi.org/10.1073/pnas.261432998>
- 591 Gary RE, Cannon JW, Foster WA (2009) Effect of sugar on male *Anopheles gambiae*  
592 mating performance, as modified by temperature, space, and body size. Parasites  
593 and Vectors 2:. <https://doi.org/10.1186/1756-3305-2-19>
- 594 Ghaninia M, Ignell R, Hansson BS (2007) Functional classification and central nervous  
595 projections of olfactory receptor neurons housed in antennal trichoid sensilla of  
596 female yellow fever mosquitoes, *Aedes aegypti*. Eur J Neurosci 26:1611–1623.  
597 <https://doi.org/10.1111/j.1460-9568.2007.05786.x>
- 598 Gibson G, Russell I (2006) Flying in tune: sexual recognition in mosquitoes. Curr Biol.  
599 <https://doi.org/10.1016/j.cub.2006.05.053>
- 600 Gibson G, Warren B, Russell IJ (2010) Humming in tune: Sex and species recognition  
601 by mosquitoes on the wing. JARO - J Assoc Res Otolaryngol 11:527–540.

- 602 <https://doi.org/10.1007/s10162-010-0243-2>
- 603 Gowda SBM, Paranjpe PD, Reddy OV, et al (2018) GABAergic inhibition of leg  
604 motoneurons is required for normal walking behavior in freely moving *Drosophila*.  
605 Proc Natl Acad Sci U S A 115:E2115–E2124.  
606 <https://doi.org/10.1073/pnas.1713869115>
- 607 Hammond A, Galizi R, Kyrou K, et al (2016) A CRISPR-Cas9 gene drive system  
608 targeting female reproduction in the malaria mosquito vector *Anopheles gambiae*.  
609 Nat Biotechnol 34:78–83. <https://doi.org/10.1038/nbt.3439>
- 610 Howell PI, Knols BGJ (2009) Male mating biology. Malar J 8: S2.  
611 <https://doi.org/10.1186/1475-2875-8-S2-S8>
- 612 Kwon HW, Lu T, Rützler M, Zwiebel LJ (2006) Olfactory response in a gustatory organ  
613 of the malaria vector mosquito *Anopheles gambiae*. Proc Natl Acad Sci U S A  
614 103:13526–13531. <https://doi.org/10.1073/pnas.0601107103>
- 615 Lecompte M, Cattaert D, Vincent A, et al (2020) *Drosophila* ammonium transporter  
616 Rh50 is required for integrity of larval muscles and neuromuscular system. J Comp  
617 Neurol 528:81–94. <https://doi.org/10.1002/cne.24742>
- 618 Liu F, Chen L, Appel AG, Liu N (2013) Olfactory responses of the antennal trichoid  
619 sensilla to chemical repellents in the mosquito, *Culex quinquefasciatus*. J Insect  
620 Physiol 59:1169–1177. <https://doi.org/10.1016/j.jinsphys.2013.08.016>
- 621 Liu F, Ye Z, Baker A, et al (2020) Gene editing reveals obligate and modulatory  
622 components of the CO<sub>2</sub> receptor complex in the malaria vector mosquito,  
623 *Anopheles coluzzii*. Insect Biochem Mol Biol 127:.

- 624 <https://doi.org/10.1016/j.ibmb.2020.103470>
- 625 Menuz K, Larter NK, Park J, Carlson JR (2014) An RNA-seq screen of the *Drosophila*  
626 antenna identifies a transporter necessary for ammonia detection. PLoS Genet 10:  
627 <https://doi.org/10.1371/journal.pgen.1004810>
- 628 Min S, Ai M, Shin SA, Suh GSB (2013) Dedicated olfactory neurons mediating attraction  
629 behavior to ammonia and amines in *Drosophila*. Proc Natl Acad Sci U S A  
630 110:1321–1329. <https://doi.org/10.1073/pnas.1215680110>
- 631 Montell C, Zwiebel LJ (2016) Mosquito sensory systems. Adv In Insect Phys 51:293–  
632 328. <https://doi.org/10.1016/bs.aiip.2016.04.007>
- 633 Pennetier C, Warren B, Dabiré KR, et al (2010) “Singing on the wing” as a mechanism  
634 for species recognition in the malarial mosquito *Anopheles gambiae*. Curr Biol  
635 20:131–136. <https://doi.org/10.1016/j.cub.2009.11.040>
- 636 Pitts RJ, Derryberry SL, Pulous FE, Zwiebel LJ (2014a) Antennal-expressed ammonium  
637 transporters in the malaria vector mosquito *Anopheles gambiae*. PLoS One 9:  
638 <https://doi.org/10.1371/journal.pone.0111858>
- 639 Pitts RJ, Derryberry SL, Zhang Z, Zwiebel LJ (2017) Variant ionotropic receptors in the  
640 malaria vector mosquito *Anopheles gambiae* tuned to amines and carboxylic acids.  
641 Sci Rep 7:. <https://doi.org/10.1038/srep40297>
- 642 Pitts RJ, Fox AN, Zwiebeil LJ (2004) A highly conserved candidate chemoreceptor  
643 expressed in both olfactory and gustatory tissues in the malaria vector *Anopheles*  
644 *gambiae*. Proc Natl Acad Sci U S A 101:5058–5063.  
645 <https://doi.org/10.1073/pnas.0308146101>

- 646 Pitts RJ, Liu C, Zhou X, et al (2014b) Odorant receptor-mediated sperm activation in  
647 disease vector mosquitoes. *Proc Natl Acad Sci U S A* 111:2566–2571.  
648 <https://doi.org/10.1073/pnas.1322923111>
- 649 Pitts RJ, Zwiebel LJ (2006) Antennal sensilla of two female anopheline sibling species  
650 with differing host ranges. *Malar J* 5:. <https://doi.org/10.1186/1475-2875-5-26>
- 651 Pondeville E, Puchot N, Meredith JM, et al (2014) Efficient  $\phi$ c31 integrase-mediated  
652 site-specific germline transformation of *Anopheles gambiae*. *Nat Protoc* 9:1698–  
653 1712. <https://doi.org/10.1038/nprot.2014.117>
- 654 Qiu YT, Smallegange RC, Hoppe S, et al (2004) Behavioural and electrophysiological  
655 responses of the malaria mosquito *Anopheles gambiae* Giles *sensu stricto* (Diptera:  
656 Culicidae) to human skin emanations. *Med Vet Entomol* 18:429–438.  
657 <https://doi.org/10.1111/j.0269-283X.2004.00534.x>
- 658 Robert D (2009) Insect bioacoustics: Mosquitoes make an effort to listen to each other.  
659 *Curr. Biol.* 19:446–449
- 660 Sadaf S, Reddy OV, Sane SP, Hasan G (2015) Neural control of wing coordination in  
661 flies. *Curr Biol* 25:80–86. <https://doi.org/10.1016/j.cub.2014.10.069>
- 662 Scaraffia PY, Isoe J, Murillo A, Wells MA (2005) Ammonia metabolism in *Aedes*  
663 *aegypti*. *Insect Biochem Mol Biol* 35:491–503.  
664 <https://doi.org/10.1016/j.ibmb.2005.01.012>
- 665 Smallegange RC, Qiu YT, van Loon JA, Takken W (2005) Synergism between  
666 ammonia, lactic acid and carboxylic acids as kairomones in the host-seeking  
667 behaviour of the malaria mosquito *Anopheles gambiae sensu stricto* (Diptera:

- 668 Culicidae). *Chem Senses* 30:145–152. <https://doi.org/10.1093/chemse/bji010>
- 669 Smallegange RC, Verhulst NO, Takken W (2011) Sweaty skin: An invitation to bite?  
670 *Trends Parasitol.* 27:143–148
- 671 Soupene E, Lee H, Kustu S (2002) Ammonium/methylammonium transport (Amt)  
672 proteins facilitate diffusion of NH<sub>3</sub> bidirectionally. *Proc Natl Acad Sci U S A*  
673 99:3926–3931. <https://doi.org/10.1073/pnas.062043799>
- 674 Suh E, Choe DH, Saveer AM, Zwiebel LJ (2016) Suboptimal larval habitats modulate  
675 oviposition of the malaria vector mosquito *Anopheles coluzzii*. *PLoS One* 11:.  
676 <https://doi.org/10.1371/journal.pone.0149800>
- 677 Sun H, Liu F, Ye Z, et al (2020) Mutagenesis of the orco odorant receptor co-receptor  
678 impairs olfactory function in the malaria vector *Anopheles coluzzii*. *Insect Biochem*  
679 *Mol Biol* 127:.. <https://doi.org/10.1016/j.ibmb.2020.103497>
- 680 Thomas GH, Mullins JGL, Merrick M (2000) Membrane topology of the Mep/Amt family  
681 of ammonium transporters. *Mol Microbiol* 37:331–344.  
682 <https://doi.org/10.1046/j.1365-2958.2000.01994.x>
- 683 Tremblay PL, Hallenbeck PC (2009) Of blood, brains and bacteria, the Amt/Rh  
684 transporter family: Emerging role of Amt as a unique microbial sensor. *Mol*  
685 *Microbiol* 71:12–22. <https://doi.org/10.1111/j.1365-2958.2008.06514.x>
- 686 World Health Organization (2019) World Malaria Report
- 687 Ye Z, Liu F, Sun H, et al (2020) Heterogeneous expression of the ammonium  
688 transporter AgAmt in chemosensory appendages of the malaria vector, *Anopheles*  
689 *gambiae*. *Insect Biochem Mol Biol* 120:.. <https://doi.org/10.1016/j.ibmb.2020.103360>



690 Zwiebel LJ, Takken W (2004) Olfactory regulation of mosquito-host interactions. *Insect*  
691 *Biochem Mol Biol* 34:645–652. <https://doi.org/10.1016/j.ibmb.2004.03.017>  
692

693 **Figure Legends**

694 **Figure 1. (A)** Schematics of the CRISPR/Cas9 strategy that induced two double-  
695 stranded breaks (indicated by vertical arrows) on *Exon 1 (E1)* and *Exon 4 (E4)*. A  
696 homology template was introduced to replace the sequences in between two double-  
697 stranded break sites with a red fluorescence marker *3xP3-DsRed*. A pair of primers  
698 (*AcAmt\_F* and *AcAmt\_R*) were used to determine the successful genetic manipulation.  
699 In theory, the wild-type produces a 3027-bp amplicon whereas the mutant renders a  
700 1930-bp amplicon; **(B)** PCR determination of CRISPR/Cas9-mediated mutagenesis in  
701 the wild-type (WT), the heterozygotes (*AcAmt<sup>+/−</sup>*), and the homozygotes (*AcAmt<sup>−/−</sup>*).

702 **Figure 2. (A)** Representative single-sensillum recordings from representative single-  
703 sensillum recording responses of coeloconic sensilla to 1% ammonia. Red bar indicates  
704 the duration of stimulations (0.5s). The scanning electron microscopy image showing  
705 the structure of a coeloconic sensillum is adopted from (Pitts and Zwiebel 2006); **(B)**  
706 Representative single-sensillum recording responses of grooved pegs to 0.5%  
707 ammonia. Red bar indicates the duration of stimulations (0.5s). The scanning electron  
708 microscopy image showing the structure of a grooved peg is adopted from (Pitts and  
709 Zwiebel 2006); **(C)** Single-sensillum responses of coeloconic sensilla to ammonia at  
710 different concentrations (N=5-7 for each concentration); **(D)** Single-sensillum responses  
711 of grooved pegs to ammonia at different concentrations (N=7-9 for each concentration);  
712 **(E)** Multiple single-sensillum responses of coeloconic sensilla to 1% ammonia with 5-s  
713 intervals (N=3). The responses were normalized to the fraction of the first stimulation;  
714 **(F)** Multiple single-sensillum responses of grooved pegs to 0.5% ammonia with 5-s  
715 intervals (N=3-5). The responses were normalized to the fraction of the first stimulation.

716 Multiple t-tests with Holm-Sidak method suggest no significant differences ( $P > 0.05$ )  
717 between the wild-type and *AcAmt*<sup>-/-</sup>. Error bars = Standard error of the mean.

718 **Figure 3. (A)** Single-sensillum recording on wild-type female coeloconic sensilla. The  
719 heatmap showing mean responses to odorants (y-axis) in coeloconic sensilla on 2<sup>nd</sup>-8<sup>th</sup>  
720 flagellomeres (x-axis; N=3-4 for each flagellomere); **(B)** Comparison of single-sensillum  
721 responses to amines and acids on total coeloconic sensilla between wild-type and  
722 *AcAmt*<sup>-/-</sup> females (Multiple t-tests with Holm-Sidak method; N=2-4 for each from  
723 flagellomere 2<sup>nd</sup>-8<sup>th</sup>; N=23-25 in total); **(C)** Comparison of single-sensillum responses to  
724 ketones, aldehydes, and alcohols on total coeloconic sensilla between wild-type and  
725 *AcAmt*<sup>-/-</sup> females (Multiple t-tests using Holm-Sidak method; N=2-4 for each from  
726 flagellomere 2<sup>nd</sup>-8<sup>th</sup>; N=23-25 in total). Error bars = Standard error of the mean.

727 **Figure 4. (A)** Representative EAG responses of the wild-type to water and ammonia;  
728 Red bar indicates the duration of stimulations (0.5s). **(B)** Upward EAG responses to  
729 ammonia at different concentrations (N=6 for each concentration); **(C)** Downward EAG  
730 responses to ammonia at different concentrations (N=6 for each concentration); **(D)**  
731 EAG responses to 1-octen-3-ol at different concentrations (N=6 for each concentration);  
732 **(E)** EAG responses to butylamine at different concentrations (N=6 for each  
733 concentration); **(F)** ELG responses to ammonia at different concentrations (N=8-15 for  
734 each concentration). Multiple t-tests using Holm-Sidak method suggest no significant  
735 differences ( $P > 0.05$ ) between the wild-type and *AcAmt*<sup>-/-</sup>. Error bars = Standard error  
736 of the mean.

737 **Figure 5. (A)** Schematics of the mating bioassay. The females and males were allowed  
738 to mate in a bucket for 5 days before the female spermathecae were dissected; **(B)**

739 Representation of inseminated and un-inseminated spermathecae stained with DAPI.  
740 The sperm heads are circled by dashed line; **(C)** Insemination rate of females in  
741 different mating pairs (F: females; M: males). Mean values with different grouping letters  
742 were significantly different (N=4; One-way ANOVA;  $P < 0.05$ ); **(D)** Progeny ratio (wild-  
743 type versus *AcAmt<sup>-/-</sup>*) from two mating pairs to test sperm competency. Chi-square test  
744 suggests the ratio is not significantly different from 50% versus 50% (N=3-4;  $P > 0.05$ ).  
745 Error bars = Standard error of the mean.

746 **Figure 6. (A-B)** Video recordings of individual mosquitoes showing distance travelled  
747 during the activity bioassay for wild-type and *AcAmt<sup>-/-</sup>* mutant females **(A)** and males **(B)**  
748 organized into 10-min bins. Sex-specific data are separated by dashed lines. **(C-J)**  
749 Mobility parameters, including mean distance travelled (cm), time spent near the sugar  
750 water (%), time spent moving (%), and turning frequency (count) for females **(C-F)** and  
751 males **(G-J)** over the full duration of the bioassay (N=9; t-test with Welch's correction);  
752 **(K-R)** Mobility parameters for females **(K-L, O-P)** and males **(M-N, Q-R)** over the first 20  
753 min of the dark cycle organized into 10-min bins (N=9; Two-way repeated measures  
754 ANOVA; \*  $< 0.05$ . \*\*\* = 0.0001. \*\*\*\*  $< 0.0001$ ). Error bars = Standard error of the mean.

755 **Figure 7. (A)** Schematics of larval rearing in pan. Pupae were consequently placed in  
756 cups to examine eclosion rate. A representative image showing a higher mortality in  
757 *AcAmt<sup>-/-</sup>* during eclosion; **(B)** Eclosion success rate. Mean values with different grouping  
758 letters were significantly different (N=5; One-way ANOVA;  $P < 0.05$ ); **(C)** Pupation rate.  
759 One-way ANOVA suggests no significant differences among the three groups (N=5;  $P >$   
760 0.05). Error bars = Standard error of the mean.

761 **Figure 8. (A)** Ammonia reacts with  $\alpha$ -ketoglutarate ( $\alpha$ -KG) and reduced nicotinamide  
762 adenine dinucleotide phosphate (NADPH) to form L-glutamate and NADP in a reaction  
763 catalyzed by glutamate dehydrogenase (GLDH) {L-glutamate: NAD(P) + oxidoreductase  
764 (deaminating), EC 1.4.1.3}, which is followed by a reduction of absorbance at 340nm;  
765 **(B)** Ammonia concentration in mosquito adults. Mean values with different grouping  
766 letters were significantly different (N=10-18; One-way ANOVA;  $P < 0.05$ ); **(C)** Ammonia  
767 concentration in mosquito pupae. Mean values with different grouping letters were  
768 significantly different (N=12; One-way ANOVA;  $P < 0.05$ ). Error bars = Standard error of  
769 the mean.

770 **Figure 9. (A)** Schematics of modified CAFE bioassay where the consumption was  
771 quantified by sugar level reduction marked on the capillary; **(B)** Sugar feeding ability in  
772 mosquito adults. Mean values with different grouping letters were significantly different  
773 (N=6-8; One-way ANOVA;  $P < 0.05$ ); **(C)** Water consumption controls in mosquito  
774 adults. One-way ANOVA suggests no significant differences among the three groups  
775 (N=6-8). Error bars = Standard error of the mean.

776 **Figure 10. (A)** Total carbohydrate content in mosquito adults. Mean values with  
777 different grouping letters were significantly different (N=8; One-way ANOVA;  $P < 0.05$ );  
778 **(B)** Total carbohydrate content in mosquito pupae. Mean values with different grouping  
779 letters were significantly different (N=6; One-way ANOVA;  $P < 0.05$ ); **(C)** Individual  
780 mosquito adult weights. Mean values with different grouping letters were significantly  
781 different (N=10-15; One-way ANOVA;  $P < 0.05$ ). Error bars = Standard error of the  
782 mean.

783 **Supplementary Table 1.** The oligonucleotide primers used in this study. **(A)** sgRNA  
784 oligos targeting *Exon 1* of *AcAmt*, **(B)** sgRNA oligos targeting *Exon 4* of *AcAmt*, **(C)**  
785 Primers amplifying the homologous arm extending from the DSB site in *Exon 1* which  
786 was inserted into the *AarI* site of the homologous template; **(D)** Primers amplifying the  
787 homologous arm extending from the DSB site in *Exon 4* which was inserted into the  
788 *SapI* site of the homologous template; **(E)** Primers used in the PCR confirmation of  
789 *AcAmt* mutagenesis.

790

## 791 **Acknowledgements**

792 We thank Zhen Li for mosquito rearing and all members of the Zwiebel lab for critical  
793 suggestions, as well as Drs. Julian Hillyer, Maulik Patel, Wenbiao Chen, and Patrick  
794 Abbot (Vanderbilt University) for valuable advice throughout the course of this work. We  
795 also thank Dr. Samuel Ochieng for technical support in conducting ELGs, Dr. Willi  
796 Honegger for comments on the manuscript and Dr. AM McAinsh for scientific copy-  
797 editing. This work was conducted with the support of Vanderbilt University and funded  
798 by the National Institutes of Health (NIAID, R21-113960) to RJP and LJZ.

799

## 800 **Declarations**

## 801 **Funding**

802 This work was conducted with the support of Vanderbilt University Endowment Funds  
803 and by a grant from the National Institutes of Health (AI113960) to LJZ.

## 804 **Conflicts of interest**

805 The authors declare that they have no competing interests.

806 **Availability of data and material**

807 All data generated or analyzed during this study are included in this published article  
808 and its supplementary information files.

809

810 **Author contributions**

811 Conceived experiments: ZY, FL, STF, RJP and LJZ; Performed research: ZY, FL, and  
812 STF; Analyzed data: ZY, FL, STF, and AB; Wrote the paper: ZY, FL, STF, AB, RJP, and  
813 LJZ. Approved the final manuscript: ZY, FL, STF, AB, RJP, and LJZ.

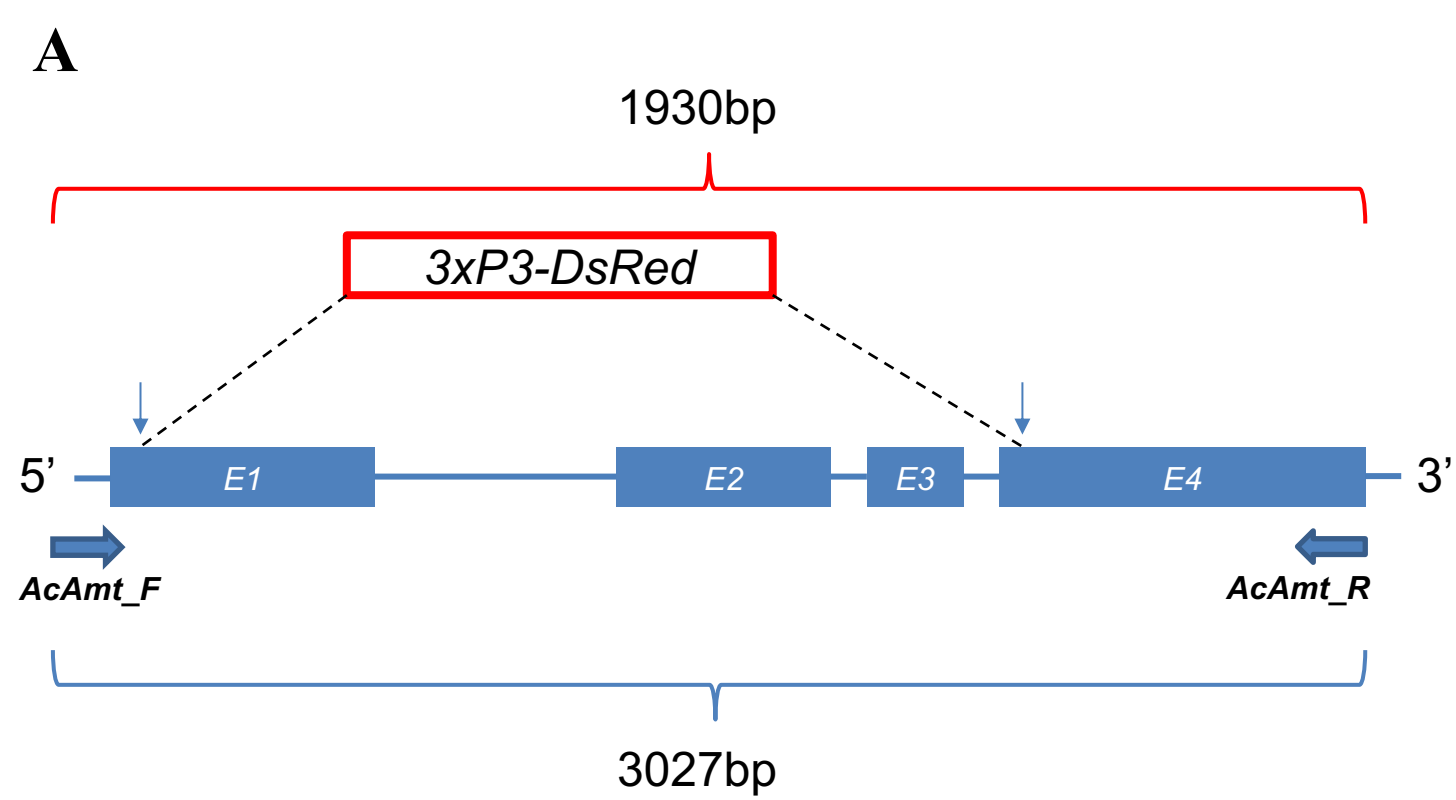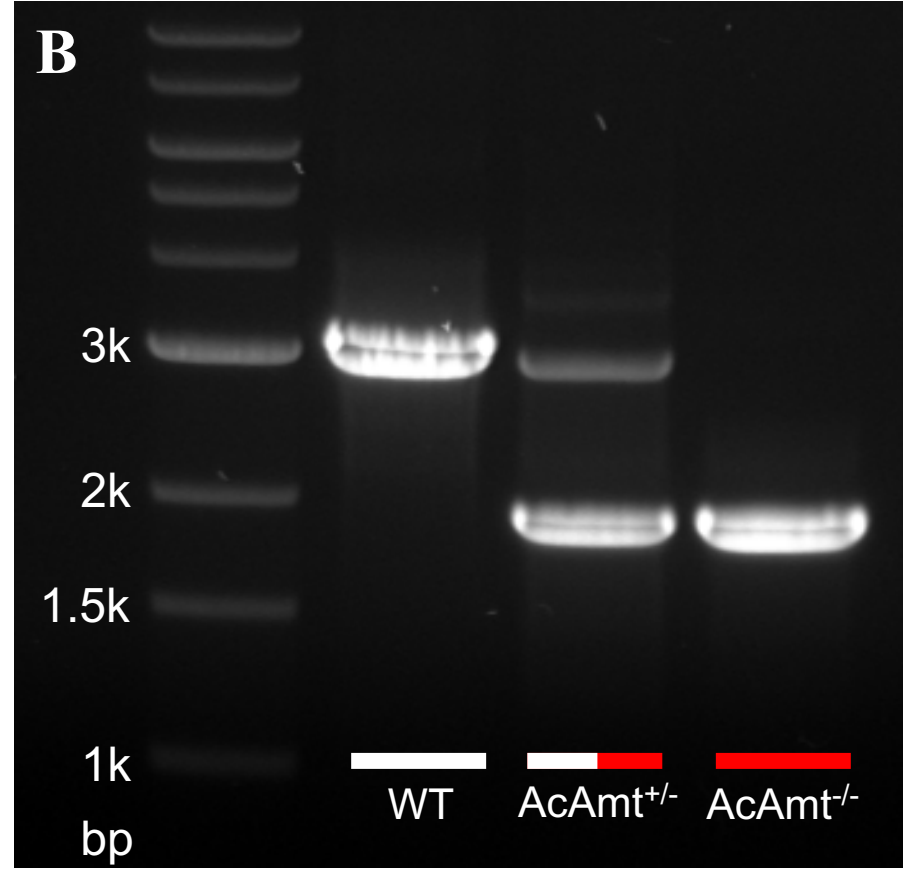



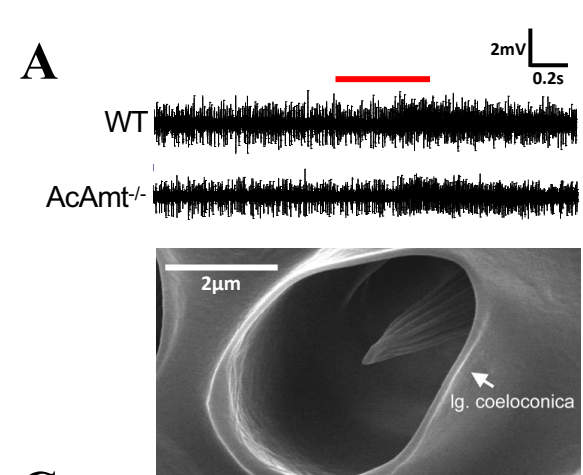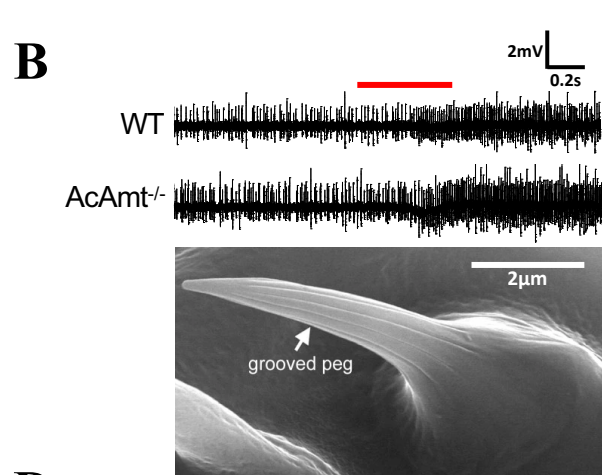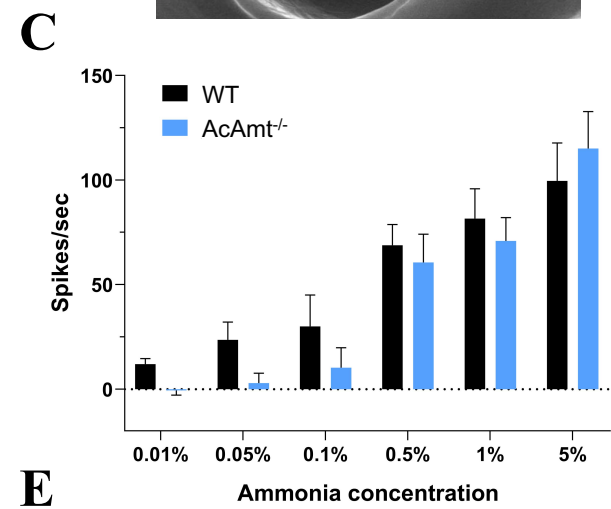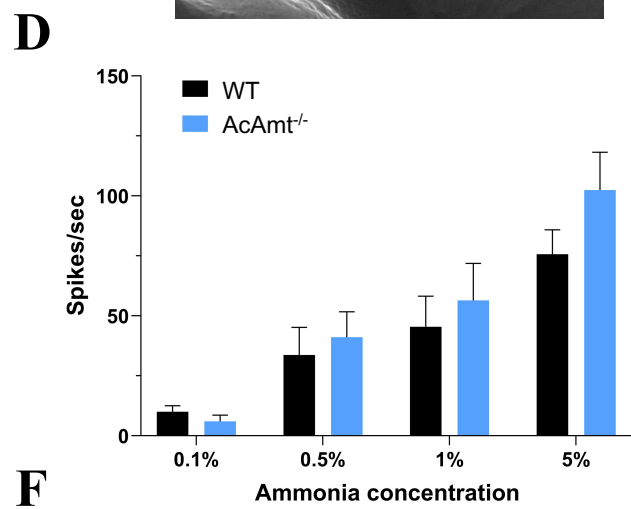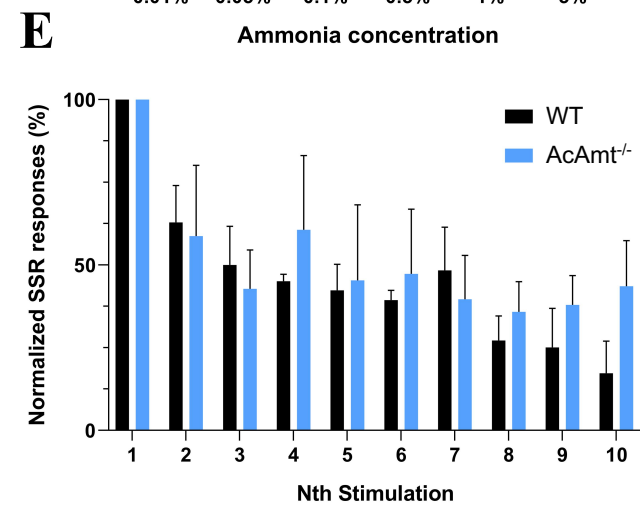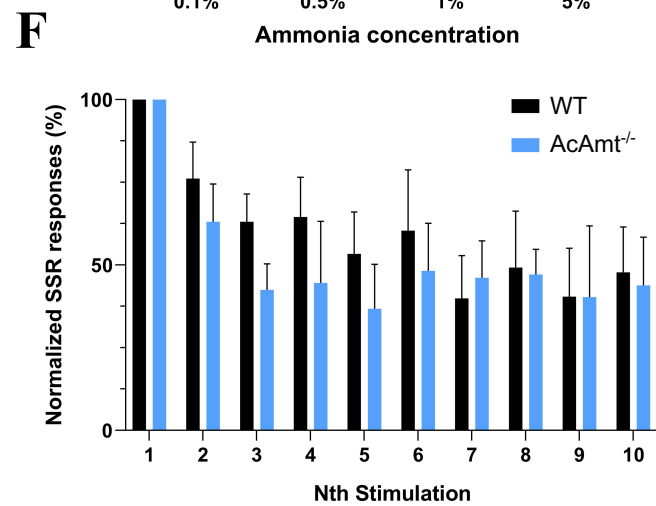

**A**

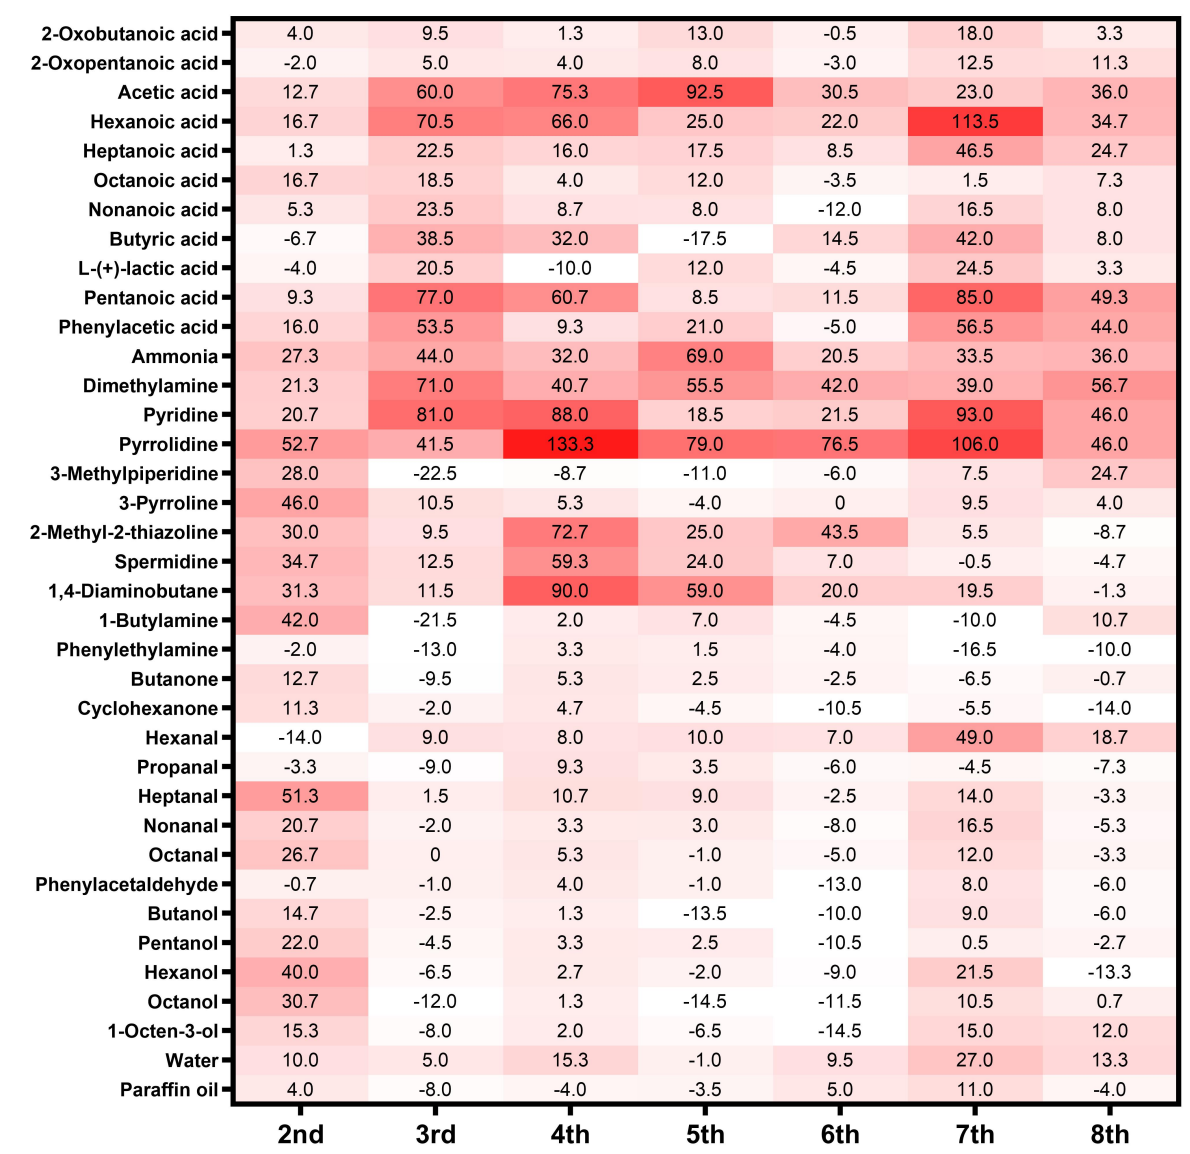

**B**

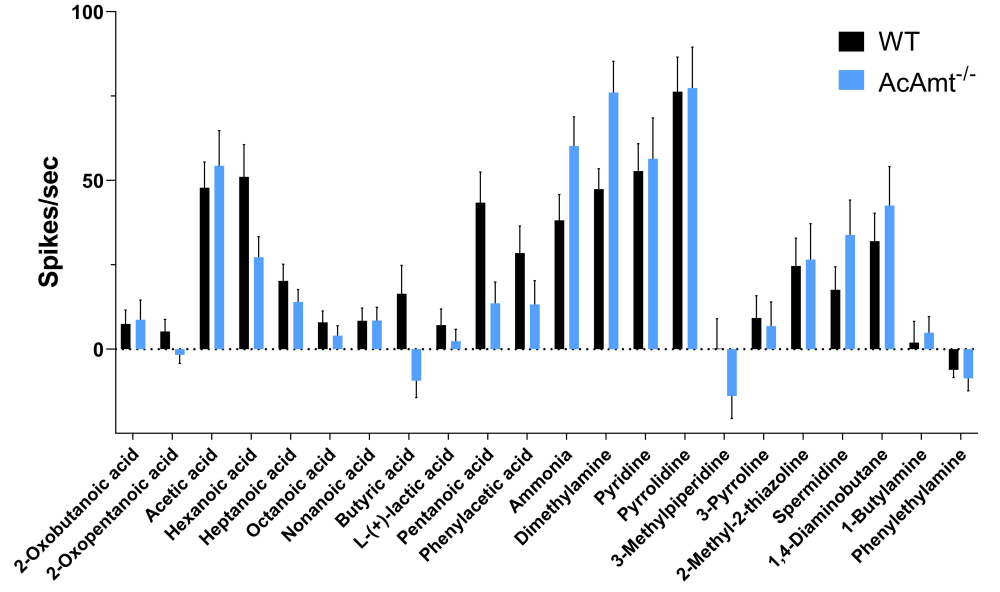

**C**

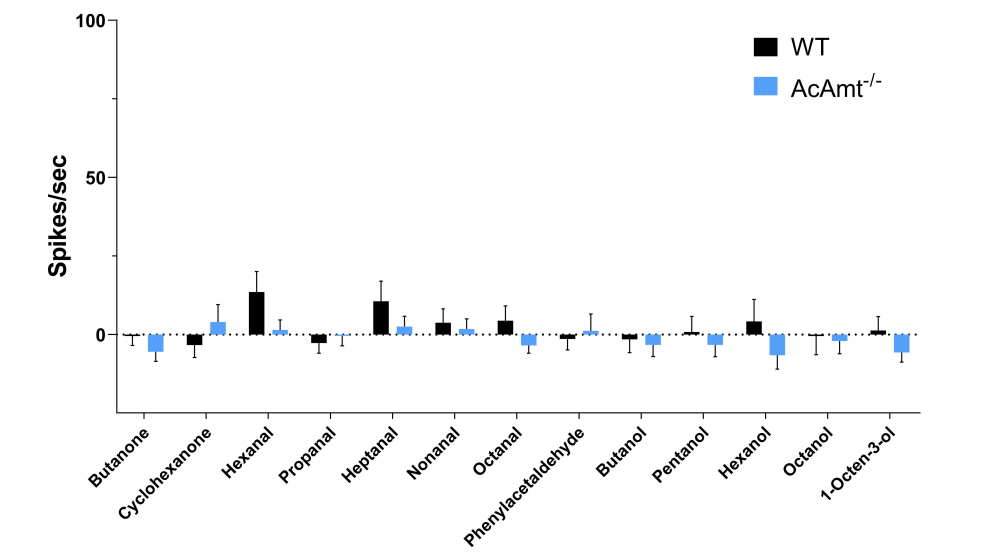

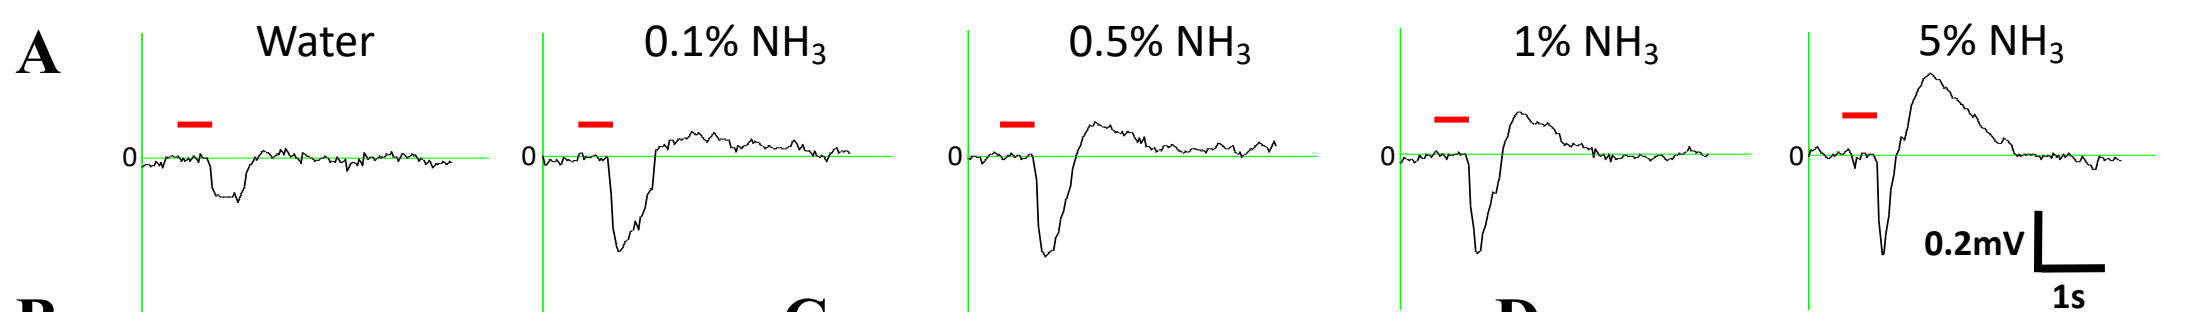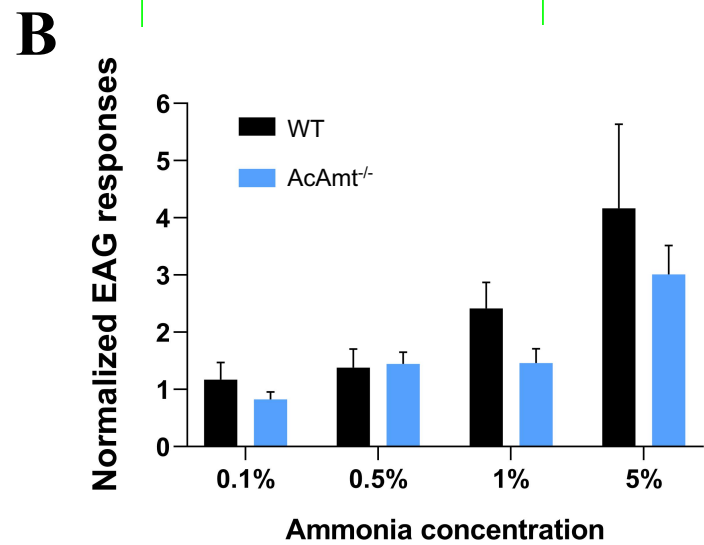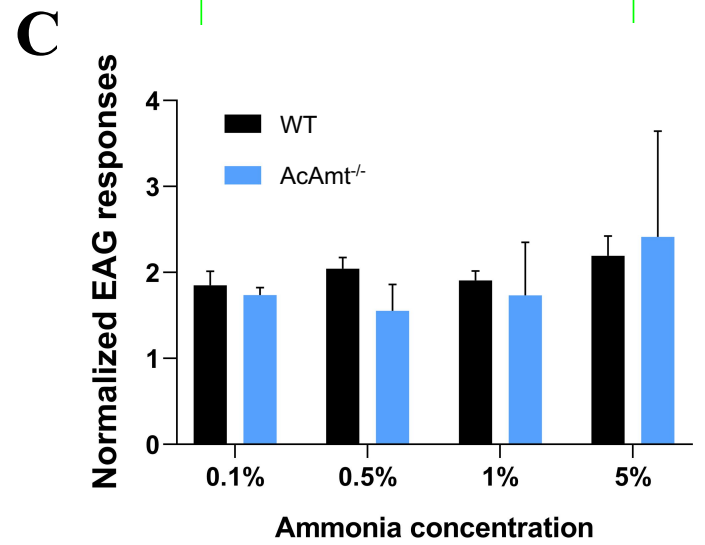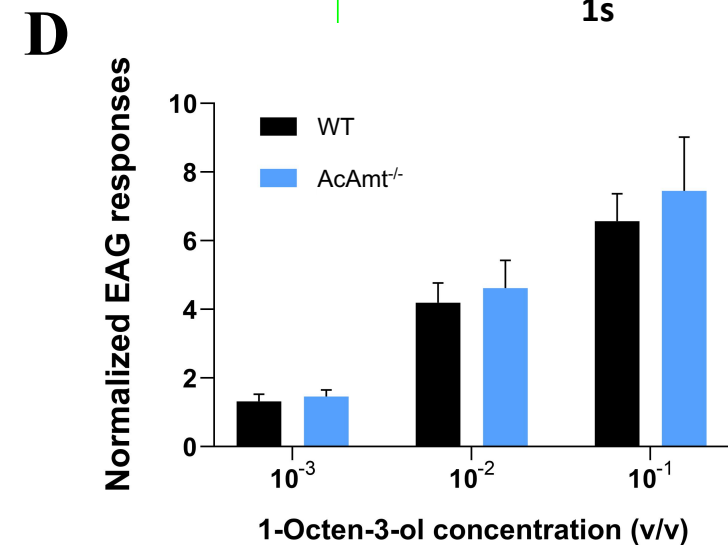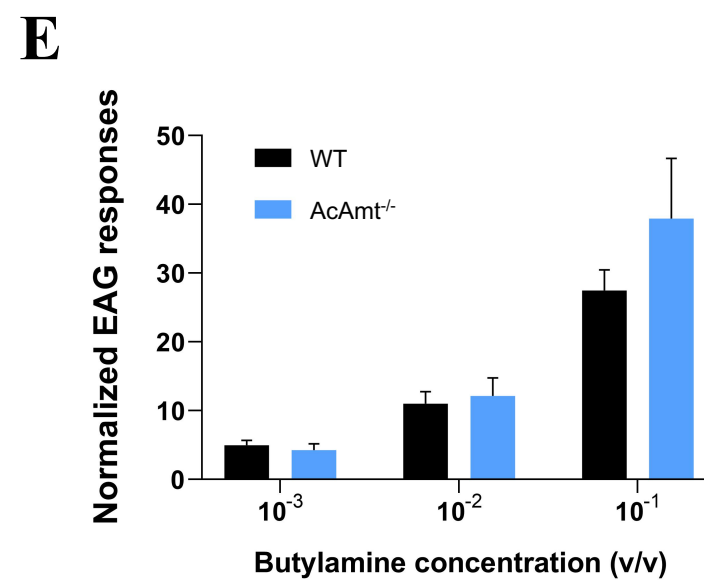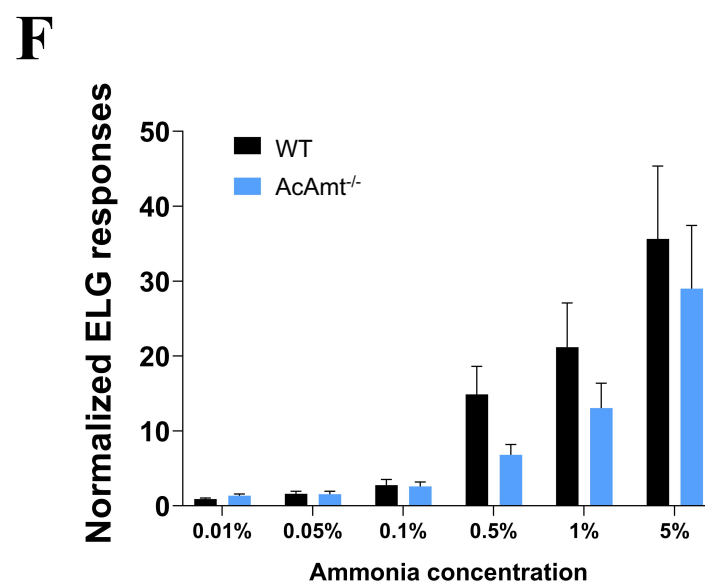

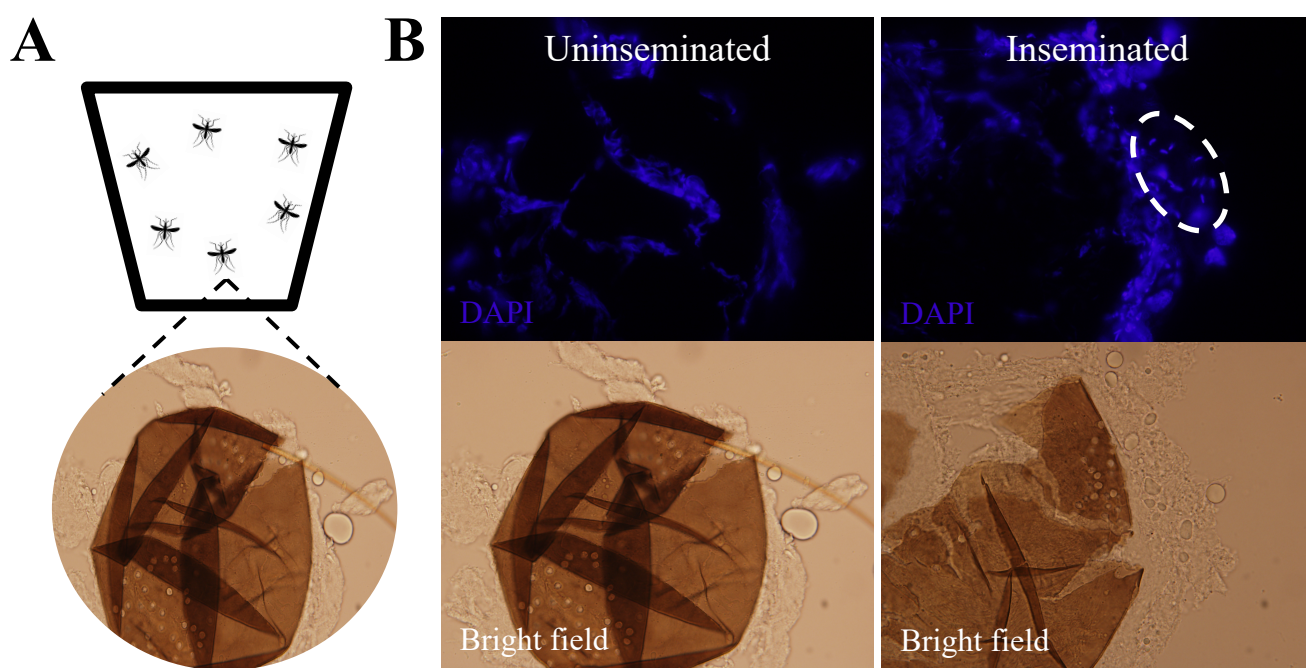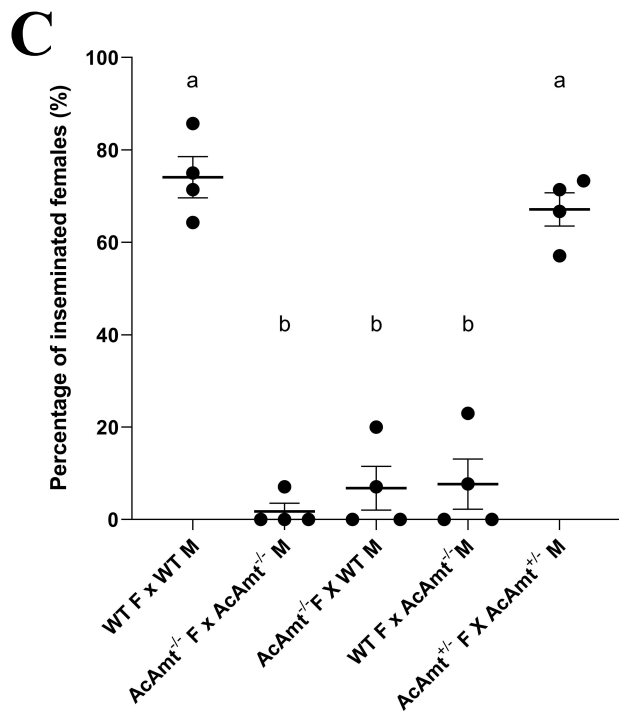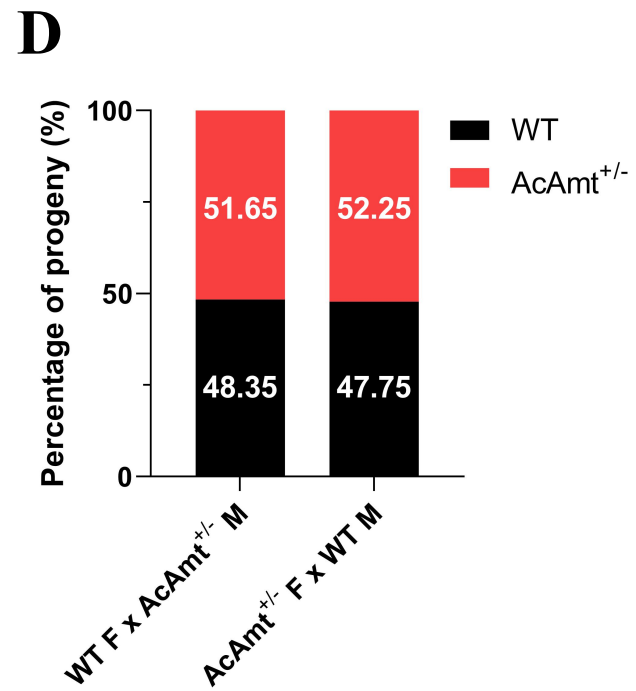

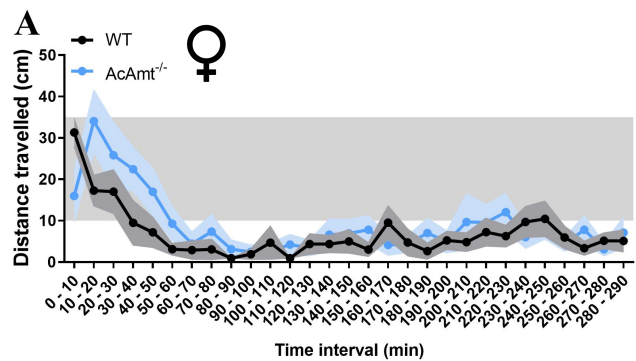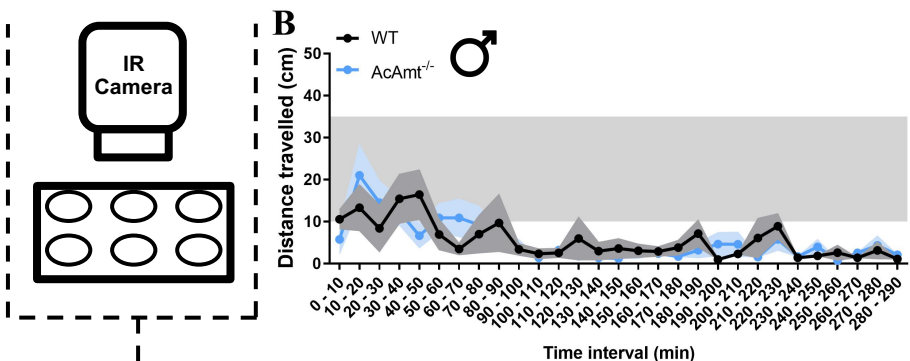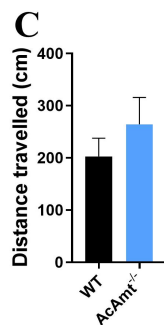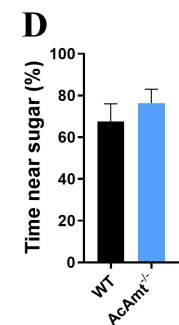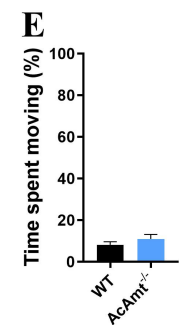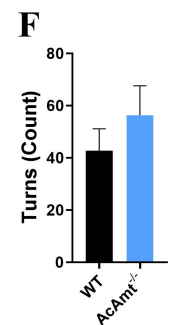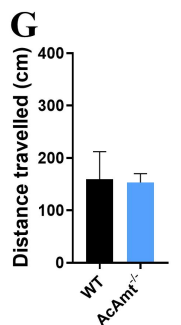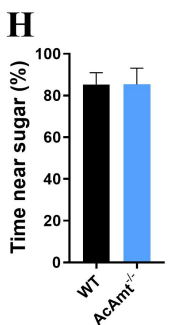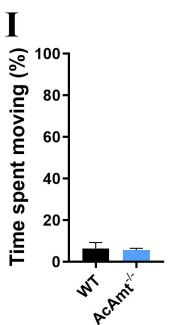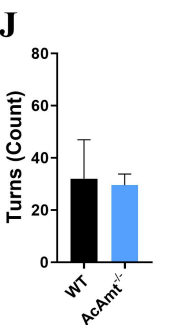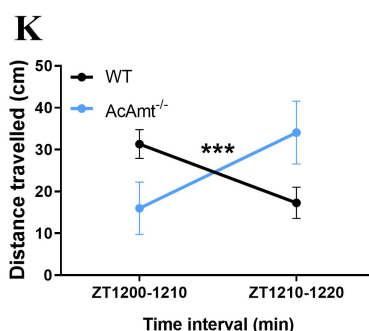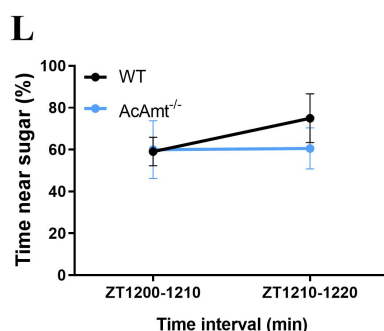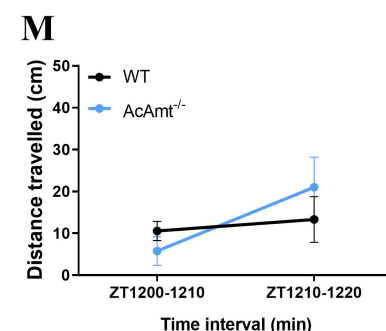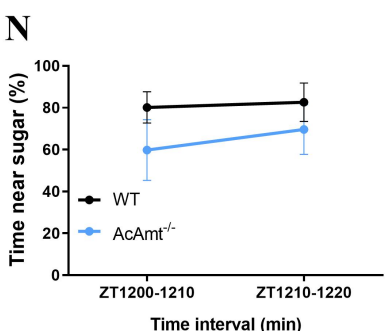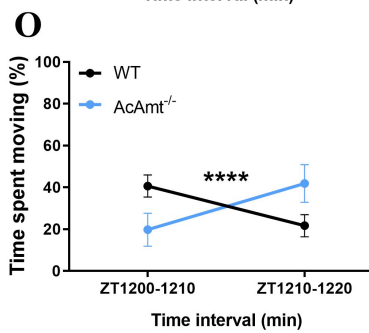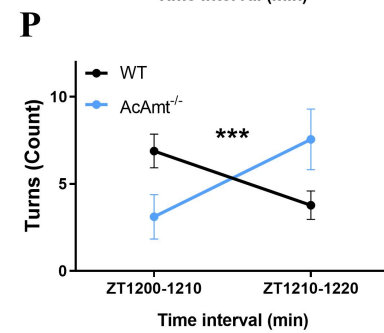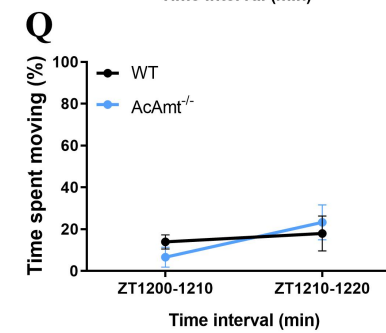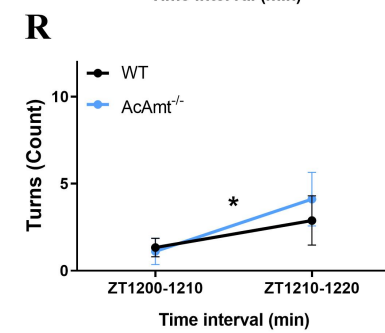

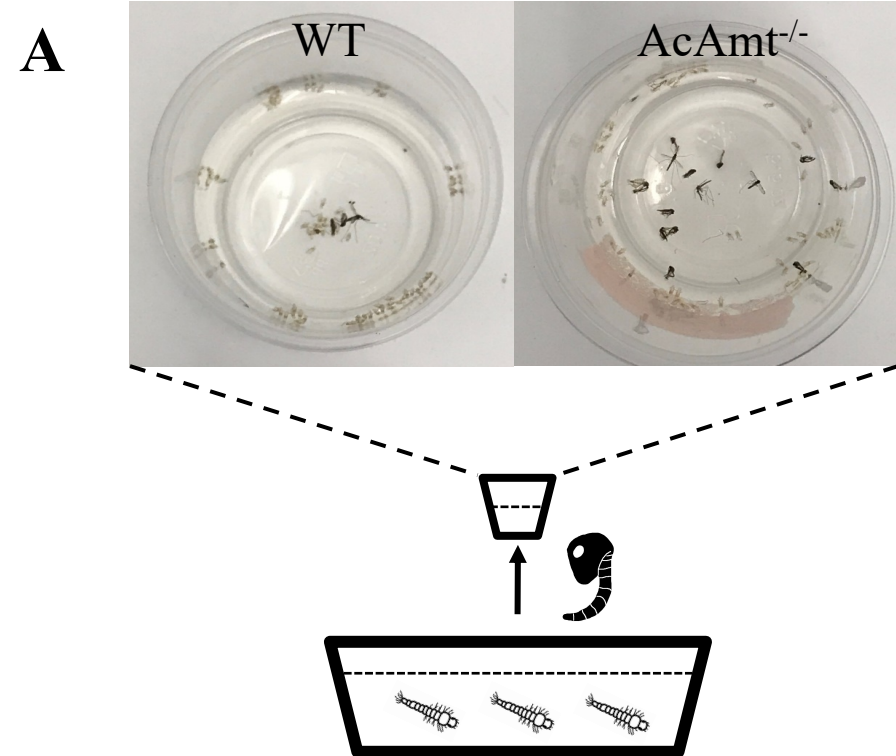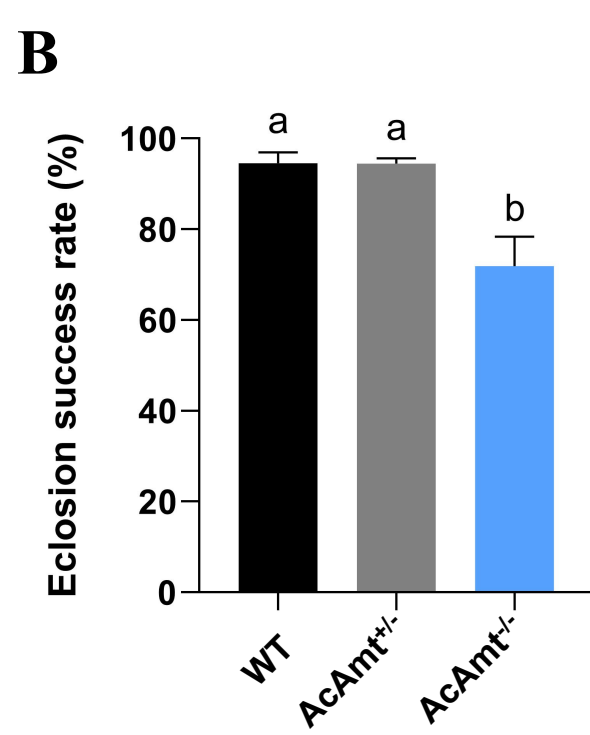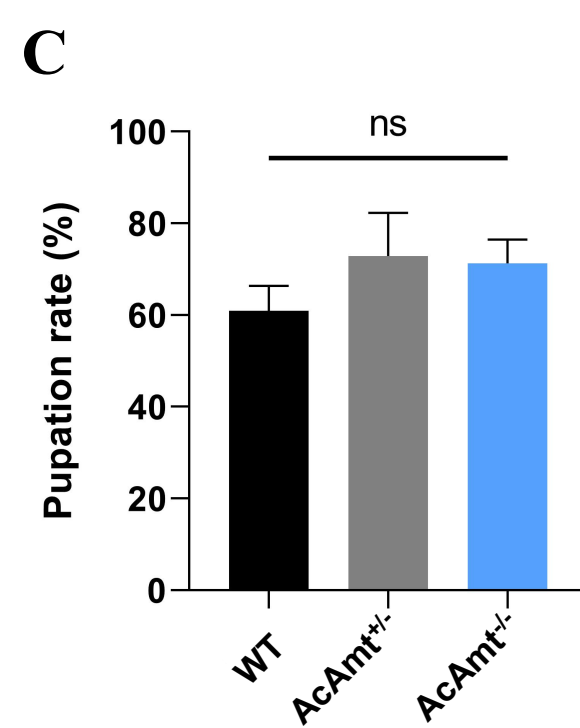

**A**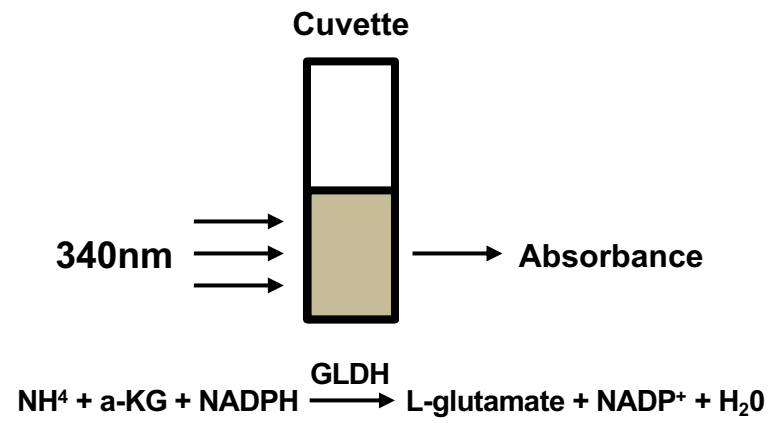**B**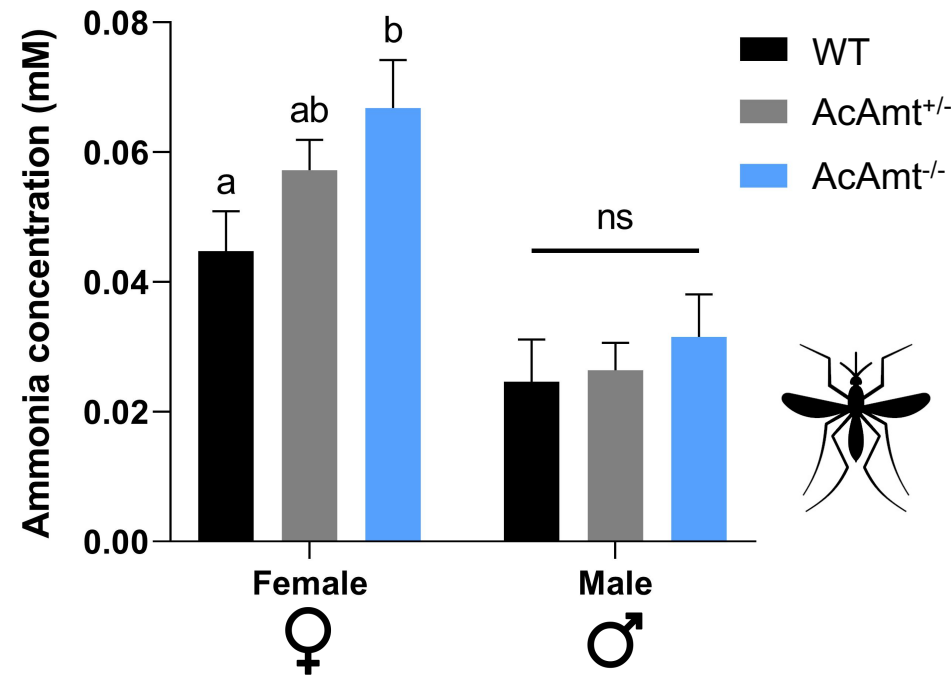**C**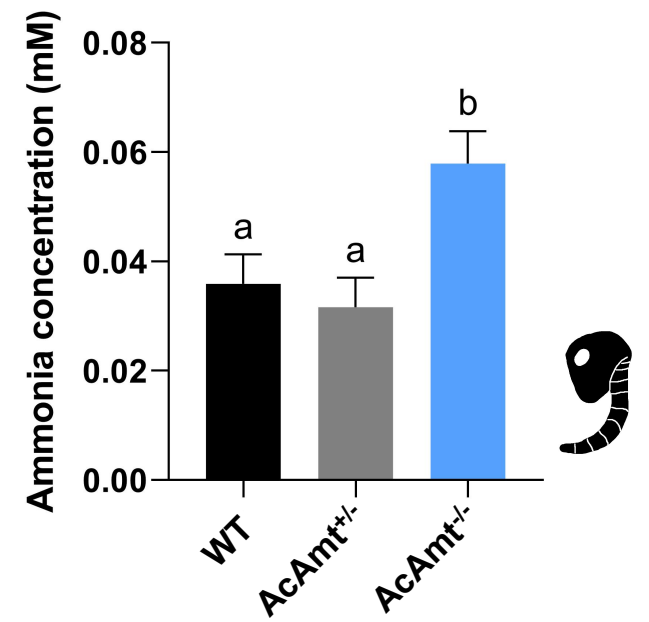

**A**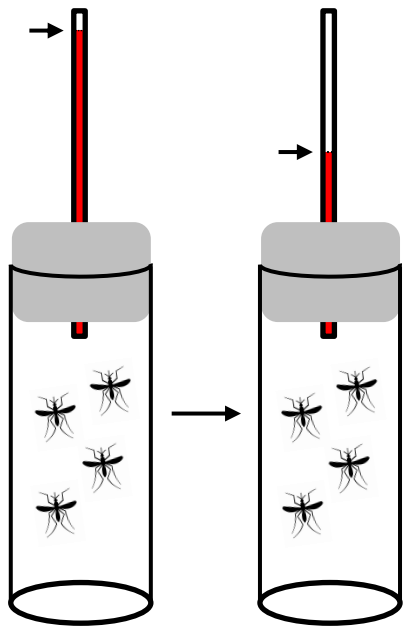**B**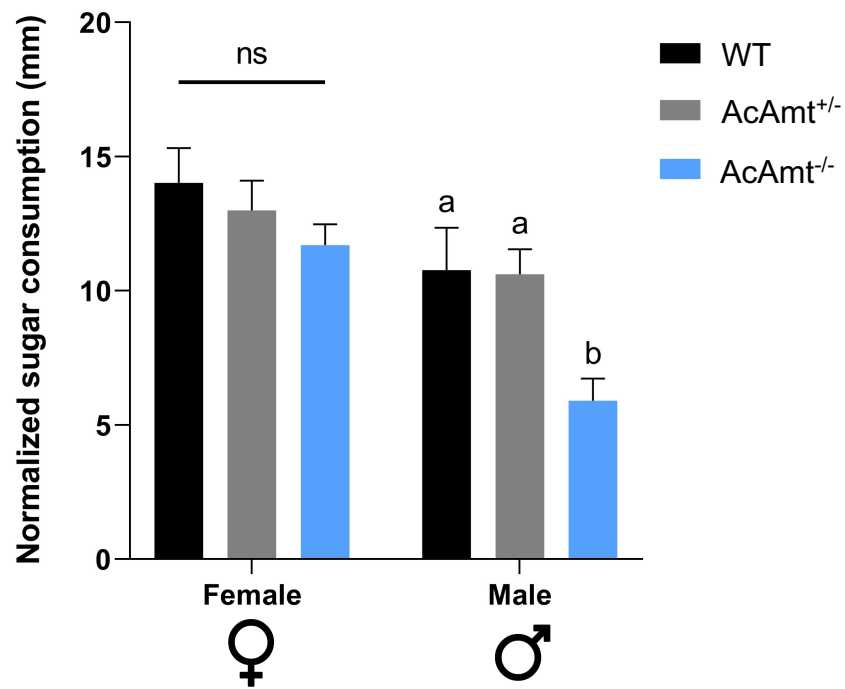**C**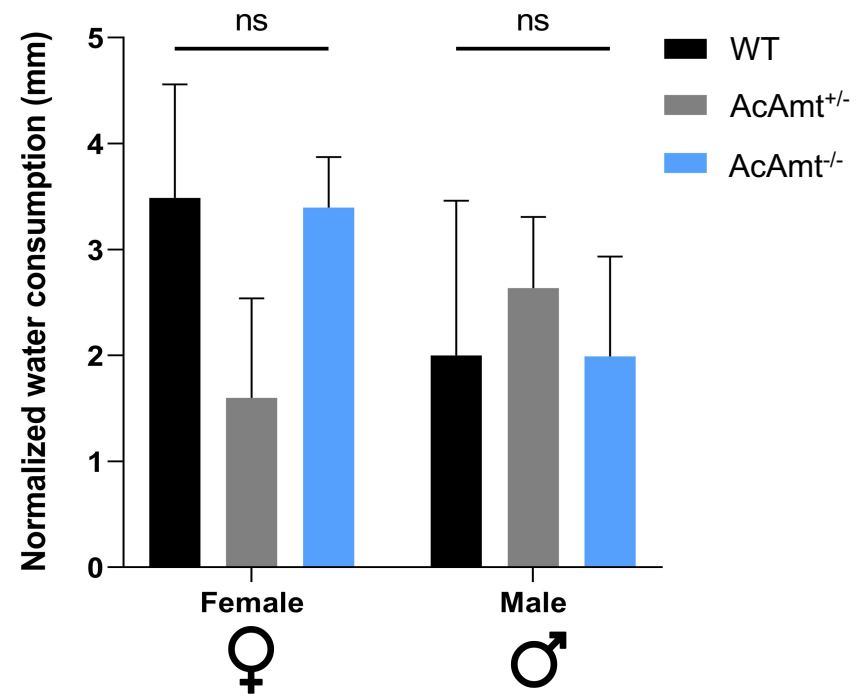



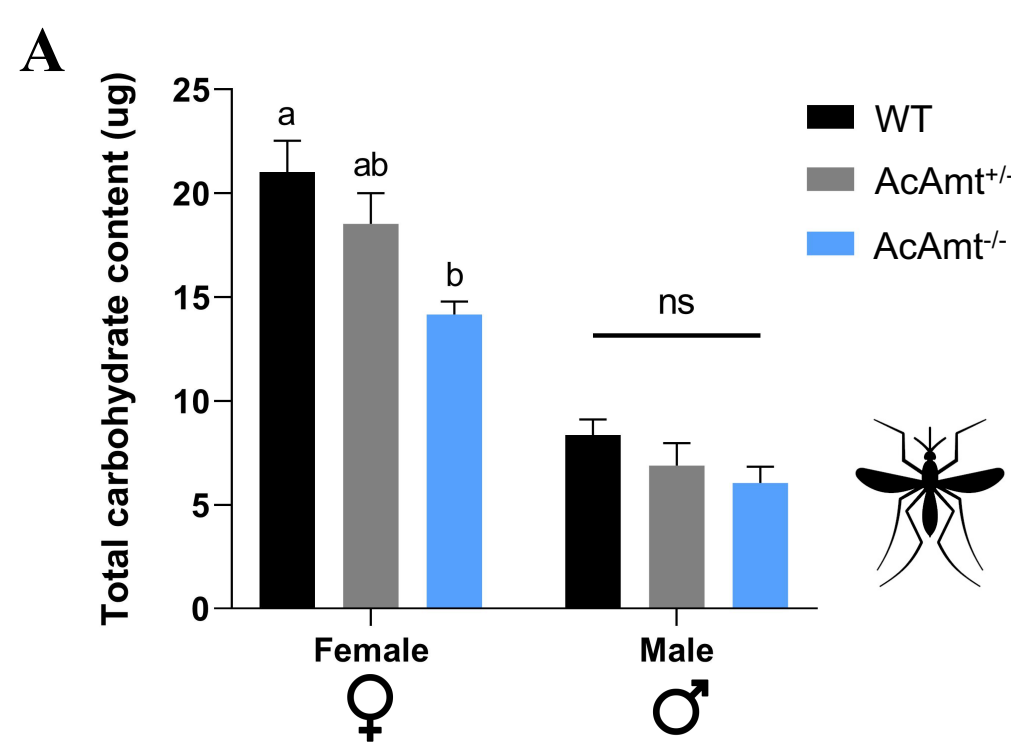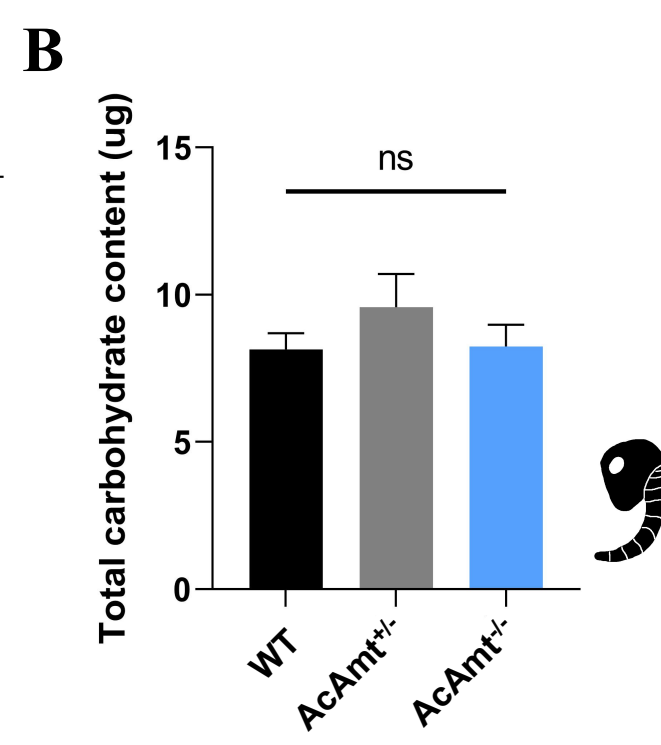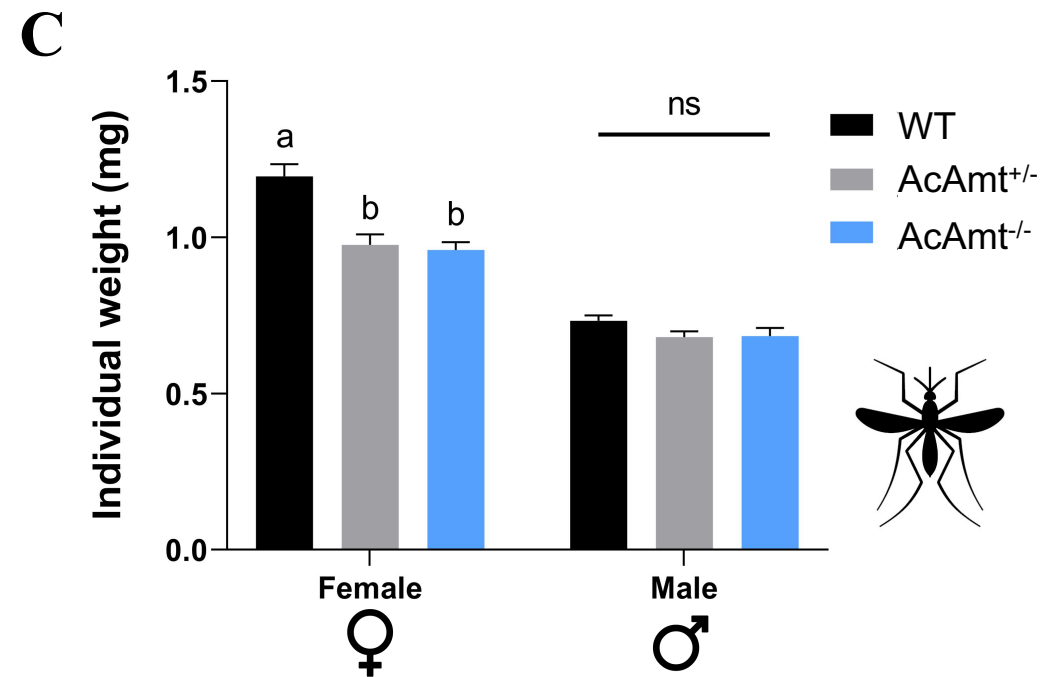

Source: https://www.biorxiv.org/content/10.1101/2021.01.29.428879v1.full.pdf
